# Supplementary material
Source: Research Square preprint supplement (doi:10.21203/rs.3.rs-9608006/v1)
Supplement: Supplementary file 1 [file ebcb952d2fa0674c1a0fd2fa.docx]

**Supplementary Information**

###

**Resolving the issue of non-specific substrate oxidation in nanozyme-assisted colorimetric assays**

Anastasia Novokshonova, Mikhail Rayev, Pavel Khramtsov

*Institute of Ecology and Genetics of Microorganisms, Urals Branch of Russian Academy of Sciences, 614081, Perm, Russia*

###

**Table S1.** Literature examples of high non-specific oxidation of TMB in the absence of nanozymes

| No | Buffer | pH | TMB, mmol/L | H2O2, mmol/L | Additives | Background (wavelength, nm) | Reference |
| --- | --- | --- | --- | --- | --- | --- | --- |
| 1 | 6 mmol/L Na-acetate | 3.5 | 1.66 | 3.33 | No | ≈0.15 (450) | [10.3390/bios13020225](https://doi.org/10.3390/bios13020225) |
| 2 | Na-acetate | 4.0 | 1 | 10 | No | ≈0.2 (652) | - 10.1016/j.redox.2024.103217 |
| 3 | NS1 | NS | 3 | 0.1 | No | ≈0.15 (652) | - [10.1002/smll.202003496](https://doi.org/10.1002/smll.202003496?urlappend=%3Futm_source%3Dresearchgate.net%26medium%3Darticle) |
| 4 | 100 mmol/L Na-acetate | 4.0 | 0.5 | 6.6 | No | ≈0.1 (652) | 10.3390/molecules28124573 |
| 5 | Na-acetate | 3.0 | NS | NS | No | ≈0.25 (652) | 10.1007/s00604-020-04391-8 |
| 6 | 100 mmol/L Na-acetate | 4.0 | NS | NS | No | ≈0.15 (652) | 10.1007/s44211-023-00411-8 |
| 7 | 180 mmol/L Na-acetate | 4.0 | 0.166 | 3.3 | No | ≈0.1 (652) | 10.3390/foods13233788 |
| 8 | 100 mmol/L Na-acetate | 4.0 | 0.5 | 6.6 | No | ≈0.1 (652) | 10.3389/fchem.2021.774486 |
| 9 | 100 mmol/L Na-acetate | 3.5 | 0.12 | NS | No | ≈0.1 (652) | - 10.1007/s00604-017-2509-4 |
| 10 | 50 mmol/L Na-acetate | 4.5 | 1.4 | 0.074 | No | ≈0.15 (652) | - 10.1007/s00604-019-3489-3 |
| 11 | 62 mmol/L phosphate | 5.0 | 8.3 | 8.3 | No | ≈0.25 (652) | 10.1007/s00604-022-05480-6 |
| 12 | NS | NS | 10 | 1000 | No | ≈0.2 (652) | 10.3762/bjnano.15.9 |
| 13 | NS | 4.0 | 0.32 | 20 | No | ≈0.1 (652) | 10.1080/09205063.2020.1716298 |
| 14 | NS | 4.0 | 2 | 50 | No | ≈0.25 (652) | 10.1016/j.inoche.2024.112580 |
| 15 | 186 mmol/L Na-acetate | 4.5 | 0.5 | 10 | No | ≈0.1 (652) | 10.1016/j.microc.2024.111363 |
| 16 | 200 mmol/L Na-acetate | 4.0 | 0.167 | 327 | No | ≈0.15 (652) | - 10.1007/s10853-018-2657-x |
| 17 | 10 mmol/L Na-acetate | 4.0 | 1.5 | 10 | No | ≈0.1 (652) | 10.1002/cbic.201800471 |
| 18 | 200 mmol/L Na-acetate | 3.5 | 0.8 | 50 | No | ≈0.15 (652) | 10.1039/C1CC11943E |
| 19 | 200 mmol/L Na-acetate | 4.0 | 0.48 | 5 | No | ≈0.1 (652) | - 10.3390/chemistry5020088 |
| 20 | 150 mmol/L Na-acetate | 3.5 | 1 | 0.1 | No | ≈0.06 (652) | 10.1039/C7TB02434G |
| 21 | NS | NS | NS | NS | No | ≈0.15 (652) | - 10.1186/s13036-019-0220-1 |
| 22 | NS | 4.0 | 0.1 | 20 | No | ≈0.15 (652) | 10.3390/bios12050260 |
| 23 | PBS | 3.5 | 1 | 0.1 | No | ≈0.1 (652) | 10.1039/D3AY01666H |
| 24 | 10 mmol/L  PBS | 4.0 | 4 | 0.5 | No | ≈0.1 (652) | 10.3390/molecules27134262 |
| 26 | 180 mmol/L Na-acetate | 4.0 | 0.166 | 3.33 | No | ≈0.1 (652) | [10.3390/foods13233788](https://www.mdpi.com/2304-8158/13/23/3788) |
| 27 | NS | NS | 0.416 | 0.416 | No | ≈0.2 (652) | 10.1016/j.aca.2025.343981 |
| 28 | 180 mmol/L Na-acetate | 4.0 | 0.25 | 0.5 | No | ≈0.1 (652) | 10.1016/j.chphma.2023.12.001 |
| 29 | Na-citrate-phosphate | NS | 0.5 | 30 | No | ≈0.15 (652) | 10.1177/00368504251362318 |
| 30 | Na-acetate | 4.0 | 1 | 5 | No | ≈0.1 (652) | - 10.1016/j.colsurfb.2022.112531 |
| 31 | Na-acetate | 4.0 | 1.2 | 1200 | No | ≈0.25 (652) | - 10.3390/bios15010030 |
| 32 | 180 mmol/L Na-acetate | 4.0 | 0.166 | 3.33 | No | ≈0.1 (652) | 10.3390/foods15030479 |
| 33 | 30 mmol/L Na-acetate | 4.0 | 0.444 | 22 | No | ≈0.2 (652) | 10.3390/biom15071002 |
| 34 | 9 mmol/L Na-acetate | 4.0 | 0.45 | 300 | No | ≈0.1 (652) | 10.3390/foods14081311 |
| 35 | Na-acetate | 4.0 | 0.5 | 50 | No | ≈0.1 (652) | 10.3390/molecules29215097 |
| 36 | Na-acetate | 3.6 | NS | NS | No | ≈0.1 (652) | 10.3390/nano14131090 |
| 37 | PBS | 7.4 | NS | NS | No | ≈0.1 (652) | 10.3390/bios14020062 |
| 38 | 133 mmol/L Na-acetate | 4.0 | 0.666 | 5 | No | ≈0.15 (652) | 10.3390/ma16186212 |
| 39 | 100 mmol/L Na-acetate | 4.0 | NS | NS | No | ≈0.1 (652) | 10.3390/molecules28166064 |
| 40 | Na-acetate | NS | 0.307 | 0.307 | No | ≈0.1 (652) | 10.3390/polym15143002 |
| 41 | 60 mmol/L Na-acetate | 3.0 | 0.1 | 0.1 | No | ≈0.2 (652) | 10.3390/molecules28093736 |
| 42 | 33 mmol/L Na-acetate | 4.0 | 2.5 | 166 | No | ≈0.25 (652) | 10.3390/foods12020291 |
| 43 | Na-acetate | 5.2 | 0.4 | 6.25 | No | ≈0.15 (652) | 10.3390/bios12100874 |
| 44 | Na-acetate | NS | NS | NS | No | ≈0.25 (652) | 10.3390/s21238050 |
| 45 | 10 mmol/L PBS | 4.0 | 1 | 25 | No | ≈0.15 (652) | 10.3389/fchem.2021.681566 |
| 46 | 90 mmol/L Na-acetate | 3.0 | 0.9 | 1.8 | No | ≈0.25 (652) | 10.3389/fchem.2022.1093073 |
| 47 | 160 mmol/L Na-acetate | 3.6 | 0.2 | 1 | No | ≈0.1 (652) | 10.3389/fchem.2020.564968 |
| 48 | 180 mmol/L Na-acetate | 3.6 | NS | NS | No | ≈0.1 (652) | 10.3389/fchem.2021.812083 |
| 49 | 100 mmol/L Na-acetate | 4.0 | 0.5 | 6.6 | No | ≈0.1 (652) | 10.3389/fchem.2021.774486 |
| 50 | 80 mmol/L Na-acetate | 3.0 | 1 | 20 | No | ≈0.1 (652) | 10.1016/j.snb.2026.139474 |
| 51 | NS | 7.0 | 0.8 | 0.1 | No | ≈0.1 (652) | - 10.1007/s11427-017-9261-9 |
| 52 | 16 mmol/L Na-acetate | 3.6 | 0.66 | 6.66 | No | ≈0.2 (652) | - 10.1016/j.saa.2026.127562 |
| 53 | 85 mmol/L Na-acetate | 4.0 | 1 | 980 | No | ≈0.1 (652) | 10.3390/app16041858 |
| 54 | Na-acetate | 3.5 | 1.6 | 2 | No | ≈0.15 (652) | 10.1007/s00604-025-07614-y |
| 55 | 100 mmol/L Na-acetate | 4.0 | 0.5 | 0.75 | No | ≈0.1 (652) | 10.1007/s00604-025-07738-1 |
| 56 | 200 mmol/L Na-acetate | 4.0 | 0.15 | 1.89 | No | ≈0.4 (652) | 10.1007/s00604-025-07400-w |
| 57 | 20 mmol/L Na-acetate | 3.0 | 0.8 | 50 | No | ≈0.4 (652) | 10.1007/s00604-025-07720-x |
| 58 | Na-acetate | 4.0 | 0.66 | 0.33 | No | ≈0.2 (652) | 10.1007/s00604-025-07361-0 |
| 59 | 54 mmol/L Na-acetate | 4.0 | 2.18 | 0.072 | No | ≈0.1 (652) | 10.1007/s00604-024-06873-5 |
| 60 | 140 mmol/L Na-acetate | 4.0 | 1 | 0.1 | No | ≈0.1 (652) | 10.1007/s12274-022-5328-9 |
| 61 | 100 mmol/L Na-acetate | 5.0 | 1 | 2 | No | ≈0.1 (652) | 10.1007/s00604-023-06070-w |
| 62 | Na-acetate | 4.0 | 0.5 | 6 | No | ≈0.15 (450) | 10.1007/s44211-024-00655-y |
| 63 | Na-acetate | 4.0 | NS | NS | No | ≈0.4 (652) | 10.1007/s13738-026-03360-x |
| 64 | Na-acetate | 4.0 | 1.25 | 1.25 | No | ≈0.2 (652) | 10.1007/s00604-024-06562-3 |
| 65 | 70 mmol/L Na-acetate | 4.0 | 10 | 20 | No | ≈0.3 (652) | 10.1007/s41664-024-00296-0 |
| 66 | 90 mmol/L Na-acetate | 3.5 | 0.3 | 20 | No | ≈0.2 (652) | 10.1007/s13369-022-07489-8 |
| 67 | 180 mmol/L Na-acetate | 4.0 | 0.166 | 3.333 | No | ≈0.15 (652) | 10.1007/s00604-024-06402-4 |
| 68 | 200 mmol/L Na-acetate | 4.0 | 0.5 | 1 | No | ≈0.2 (652) | 10.1007/s44211-023-00387-5 |
| 69 | 200 mmol/L Na-acetate | 4.0 | 0.5 | 0.4 | No | ≈0.3 (652) | 10.1007/s00604-024-06264-w |
| 70 | Na-acetate | NS | NS | NS | No | ≈0.2 (652) | 10.1007/s00604-025-07531-0 |
| 71 | 100 mmol/L Na-acetate | 4.0 | 10 | 100 | No | ≈0.15 (652) | 10.1007/s00604-023-05757-4 |
| 72 | Na-acetate | 3.5 | 0.4 | 1000 | No | ≈0.1 (652) | 10.1007/s00604-023-06073-7 |
| 73 | 180 mmol/L Na-acetate | 3.2 | 0.5 | 10 | No | ≈0.1 (652) | 10.1007/s40242-022-2259-7 |
| 74 | 50 mmol/L Na-acetate | 4.0 | NS | NS | No | ≈0.1 (652) | 10.1007/s44211-023-00339-z |
| 75 | 200 mmol/L Na-acetate | 4.0 | 0.1 | 5 | No | ≈0.15 (652) | 10.1007/s00604-024-06718-1 |
| 76 | Na-acetate | 2.5 | 5 | 2.76 | No | ≈1.1 (652) | 10.1007/s13399-023-04036-9 |
| 77 | Na-acetate | 4.5 | 0.188 | 94 | No | ≈0.2 (652) | 10.1007/s00604-025-07742-5 |
| 78 | Na-acetate | 3.5 | 0.3 | 0.3 | No | ≈0.25 (652) | 10.1007/s00216-022-04164-7 |
| 79 | 10 mmol/L Na-acetate | 3.5 | 0.1 | 4 | No | ≈0.1 (652) | 10.1007/s44211-026-00879-0 |
| 80 | 20 mmol/L Na-acetate | 3.5 | 0.2 | 10 | No | ≈0.1 (652) | 10.1007/s00604-022-05227-3 |
| 81 | Na-acetate | 4.0 | 1.25 | 1.25 | No | ≈0.4 (652) | 10.1007/s00604-025-07243-5 |
| 82 | 100 mmol/L Na-acetate | 4.0 | 20 | 25 | No | ≈0.1 (652) | 10.1002/slct.202101660 |
| 83 | 170 mmol/L Na-acetate | 3.5 | 0.5 | 0.5 | No | ≈0.25 (652) | 10.1016/j.cej.2020.125130 |
| 84 | 100 mmol/L Na-acetate | 3.5 | 0.048 | 0.303 | No | ≈0.1 (652) | - 10.1007/s11051-019-4662-7 |
| 85 | 200 mmol/L Na-acetate | 3.0 | 1 | 0.05 | No | ≈0.15 (652) | - 10.1021/acsami.0c15900 |
| 86 | 180 mmol/L Na-acetate | 4.2 | 0.8 | 5 | No | ≈0.15 (652) | 10.1021/acssuschemeng.0c06325 |
| 87 | Na-acetate | 3.5 | 0.5 | 0.1 | No | ≈0.1 (652) | 10.1039/C9RA03111A |
| 88 | Na-acetate | 3.6 | 0.35 | 0.59 | No | ≈0.1 (652) | 10.1021/acsomega.3c05748 |
| 89 | 75 mmol/L Na-acetate | 4.0 | 0.5 | 15 | No | ≈0.5 (652) | 10.1021/acs.langmuir.2c00911 |
| 90 | NS | NS | NS | NS | No | ≈0.5 (652) | 10.1016/j.electacta.2026.148214 |
| 91 | PBS | 6.0 | 0.2 | 0.33 | No | ≈0.2 (652) | 10.1039/d4ra05976j |
| 92 | NS | 4.0 | 2 | 100 | No | ≈0.2 (652) | 10.1016/j.inoche.2024.112580 |
| 93 | 70 mmol/L Na-acetate | 4.0 | 1.8 | 0.2 | No | ≈0.5 (652) | 10.1016/j.microc.2024.110529 |
| 94 | 70 mmol/L Na-acetate | 4.0 | 0.38 | 1 | No | ≈0.1 (652) | 10.1016/j.cej.2024.152663 |
| 95 | Na-acetate | 4.0 | 2 | 0.6 | No | ≈0.1 (652) | 10.1016/j.apsusc.2024.159695 |
| 96 | Na Phosphate-citrate | 4.0 | 0.5 | 50 | No | ≈0.4 (652) | 10.1039/d3na00210a |
| 97 | Na-acetate | 4.0 | 0.125 | 0.125 | No | ≈0.4 (652) | 10.1016/j.microc.2023.109381 |
| 98 | 90 mmol/L Na-acetate | 3.5 | 0.044 | 0.6 | No | ≈0.1 (652) | 10.1016/j.talanta.2023.124407 |
| 99 | PBS | 5.0 | 1.7 | 1.29 | No | ≈0.35 (652) | 10.3389/fbioe.2024.1364700 |
| 100 | 180 mmol/L Na-acetate | 4.0 | 0.166 | 3.33 | No | ≈0.1 (652) | 10.1016/j.lwt.2023.115260 |
| 101 | 172 mmol/L Na-acetate | 4.4 | 1.23 | 0.061 | No | ≈0.15 (652) | 10.1016/j.microc.2024.111504 |
| 102 | 10 mmol/L Na-acetate | 5.0 | 0.5 | 4 | No | ≈0.35 (652) | 10.1016/j.talanta.2024.126345 |
| 103 | NS | 4.0 | 0.5 | 1 | No | ≈0.1 (652) | 10.1016/j.talanta.2023.124967 |
| 104 | NS | NS | NS | NS | No | ≈0.15 (652) | 10.1016/j.foodres.2024.115272 |
| 105 | 200 mmol/L Na-acetate | 4.0 | NS | NS | No | ≈0.25 (652) | 10.1016/j.jfca.2024.106628 |
| 106 | 90 mmol/L Na-acetate | 4.0 | 0.2 | 0.245 | No | ≈0.35 (652) | 10.1007/s11696-025-04121-5 |
| 107 | NS | NS | NS | NS | No | ≈0.4 (652) | 10.1016/j.aca.2024.343115 |
| 108 | 100 mmol/L Na-acetate | 4.0 | 0.17 | 0.34 | No | ≈0.1 (652) | 10.1016/j.microc.2023.109842 |
| 109 | 200 mmol/L Na-acetate | 4.0 | 1 | 1 | No | ≈0.2 (652) | 10.1016/j.colsurfa.2024.134955 |
| 110 | 100 mmol/L Na-acetate | 4.0 | 2 | 0.1 | No | ≈0.2 (652) | 10.1016/j.aca.2024.342225 |

1 Not specified

**Table S2.** Literature examples of low non-specific oxidation (A450 < 0.1) of TMB in the absence of nanozymes

| No | Buffer | pH | TMB, mmol/L | H2O2, mmol/L | Additives | Reference |
| --- | --- | --- | --- | --- | --- | --- |
| 1 | 33 mmol/L Na-acetate | 3.5 | 0.166 | 33 | No | 10.1021/acs.nanolett.2c04235 |
| 2 | Na-acetate | 4.0 | 0.4 | 0.66 | No | - 10.1016/j.sbsr.2023.100595 |
| 3 | 10 mmol/L Na-acetate | 4.0 | 1 | 0.4 | No | - 10.1016/j.aca.2024.342715 |
| 4 | 10 mmol/L Na-acetate | 5.0 | 0.1 | 10 | No | 10.3390/molecules30020423 |
| 5 | 100 mmol/L Na-acetate | 4.0 | 0.1 | 10 | No | 10.3390/bios14120563 |
| 6 | NS1 | 4.0 | 0.5 | 5 | No | 10.3390/bios13080827 |
| 7 | 50 mmol/L Na-acetate | 5.0 | 0.2 | 2 | No | 10.3390/bios13060583 |
| 8 | Water | NS | 0.75 | 10 | No | 10.3390/molecules28010070 |
| 9 | Water | 7.0 | 2.5 | 0.0025 | No | - 10.3390/catal12101105 |
| 10 | 20 mmol/L PBS | 3.5 | 0.8 | 4 | No | - 10.3390/nano8070451 |
| 11 | Na-acetate | 4.0 | 0.24 | 0.2 | No | 10.3390/s16040584 |
| 12 | 10 mmol/L PBS | 5.35 | 0.2 | NS | No | 10.1038/s41598-025-26164-0 |
| 13 | 14 mmol/L PBS | 4.0 | 0.3 | 3.75 | No | 10.1007/s00604-024-06571-2 |
| 14 | NS | 4.5 | 0.05 | NS | No | 10.1007/s00216-024-05317-6 |
| 15 | Na-acetate | 4.5 | NS | NS | No | 10.1007/s12598-025-03349-0 |
| 16 | 100 mmol/L Na-acetate | 3.6 | 0.2 | 2 | No | - 10.1007/s00216-024-05440-4 |
| 17 | 0.7 mmol/L Na-acetate | 3.8 | 0.47 | 0.47 | No | 10.1007/s00604-025-06961-0 |
| 18 | NS | 4.0 | 0.75 | 10 | No | 10.1007/s00604-025-07428-y |
| 19 | 30 mmol/L PBS | 4.0 | 0.8 | 1 | No | - 10.1007/s00604-025-07112-1 |
| 20 | Na-acetate | 2.5 | 0.54 | 0.007 | No | 10.1007/s10904-025-04082-y |
| 21 | 9.4 mmol/L Na-acetate | 5.0 | 0.2 | 0.9 | No | - 10.1007/s00216-025-05904-1 |
| 22 | Na-acetate | 4.0 | 0.33 | 1.6 | No | 10.1007/s00604-025-07324-5 |
| 23 | 10 mmol/L Na-acetate | 4.0 | 0.25 | 65 | No | 10.1007/s00604-025-07056-6 |
| 24 | 180 mmol/L Na-acetate | 4.0 | 0.25 | 5 | No | 10.1007/s00216-022-04453-1 |
| 25 | TRIS-HCl | 7.0 | NS | NS | No | - 10.1007/s00216-024-05234-8 |
| 26 | 20 mmol/L PBS | 4.0 | 0.8 | 2 | No | 10.1007/s10904-025-03887-1 |
| 27 | 160 mmol/L Na-acetate | 4.0 | 0.73 | 2.9 | No | 10.1007/s00604-025-07356-x |
| 28 | Na-acetate | 4.0 | 0.5 | 50 | No | 10.1007/s11144-025-02856-6 |
| 29 | Na-acetate | 4.0 | 0.24 | 20 | No | 10.1007/s00604-025-07185-y |
| 30 | 100 mmol/L Na-acetate | 3.5 | 0.25 | 0.1 | No | 10.1007/s00216-024-05196-x |
| 31 | 20 mmol/L Na-acetate | 4.0 | 0.1 | 2 | No | 10.1007/s00604-023-06127-w |
| 32 | Na-acetate | 4.5 | 1.25 | 12.5 | No | 10.1007/s10895-026-04745-0 |
| 33 | 160 mmol/L Na-acetate | 3.6 | 0.032 | 4 | No | 10.1007/s00604-025-07082-4 |
| 34 | 100 mmol/L Na-acetate | 5.0 | 0.6 | 80 | No | 10.1007/s00216-023-04590-1 |
| 35 | 5 mmol/L Na-acetate | 4.0 | 0.1 | 10 | No | 10.1007/s10895-024-04057-1 |
| 36 | 200 mmol/L Na-acetate | 4.0 | 0.5 | 0.1 | No | 10.1007/s00604-025-07501-6 |
| 37 | 100 mmol/L Na-acetate | 4.0 | 0.1 | 0.1 | No | 10.1007/s00604-025-07824-4 |
| 38 | PBS | 5.0 | 3 | 0.1 | No | 10.1038/s41598-025-32611-9 |
| 39 | Na-acetate | 4.0 | 0.145 | 0.58 | No | 10.1007/s11696-025-03931-x |
| 40 | Na-acetate | 3.0 | 1.38 | 1.38 | No | 10.1007/s00604-025-07368-7 |
| 41 | Na-acetate | 4.0 | 0.25 | NS | No | 10.1016/j.microc.2024.110962 |
| 42 | Na-acetate | 3.8 | 0.45 | 9.1 | No | 10.1016/j.talanta.2024.126621 |
| 43 | 55 mmol/L Na-acetate | 4.0 | 0.444 | 0.222 | No | 10.1016/j.microc.2024.111040 |
| 44 | 10 mmol/L Na-acetate | 4.0 | 0.1 | 25 | No | 10.1016/j.clay.2024.107507 |
| 45 | 88 mmol/L Na-acetate | 4.0 | 0.272 | 136 | No | 10.1016/j.cej.2024.149913 |
| 46 | 90 mmol/L Na-acetate | 4.0 | 0.3 | 0.1 | No | 10.1016/j.talanta.2024.126490 |
| 47 | 10 mmol/L Na-acetate | 3.5 | 0.2 | 5 | No | 10.1016/j.snb.2024.136246 |
| 48 | Na-acetate | 4.0 | 0.375 | 7.5 | No | 10.1016/j.snb.2024.136012 |
| 49 | 185 mmol/L Na-acetate | 4.0 | 0.166 | 3.3 | No | 10.1016/j.microc.2024.112033 |
| 50 | NS | NS | 0.5 | 2 | No | 10.1016/j.talanta.2024.125852 |
| 51 | 76 mmol/L Na-acetate | 3.5 | 0.5 | 1.2 | No | 10.1016/j.saa.2023.123156 |
| 52 | 50 mmol/L Na-acetate | 3.0 | 0.161 | 32 | No | 10.1002/smll.202101907 |
| 53 | 100 mmol/L Na-acetate | 4.0 | 0.5 | 10 | No | 10.1002/smll.202005865 |
| 54 | 160 mmol/L Na-acetate | 3.0 | 0.25 | 150 | No | - 10.1007/s00604-017-2235-y |
| 55 | 150 mmol/L Na Phosphate-citrate | 4.5 | 0.5 | 1 | No | 10.1007/s00216-023-04975-2 |
| 56 | 100 mmol/L Na Phosphate-citrate | 3.0 | 1 | 326 | No | 10.34133/2022/9831012 |
| 57 | NS | NS | 2 | 10 | No | 10.1016/j.aca.2024.343150 |
| 58 | 50 mmol/L Na-acetate | 4.0 | 1 | 1 | No | 10.1016/j.talanta.2022.123451 |
| 59 | 20 mmol/L Na-citrate | 5.0 | 1 | 1 | No | 10.3389/fmicb.2021.791227 |
| 60 | 17 mmol/L Na-acetate | 4.0 | 0.82 | 51 | No | 10.1007/s42114-025-01583-9 |
| 61 | Na-acetate | 3.5 | 0.5 | 0.1 | No | 10.1007/s10876-023-02447-2 |
| 62 | 4.6 mmol/L PBS | 7.4 | 8 | 8 | No | 10.1007/s00604-023-06087-1 |
| 63 | Na-citrate–phosphate | 5.0 | 1 | 980 | No | 10.1007/s00216-025-06125-2 |
| 64 | 3.8 mmol/L Na-citrate | 5.5 | 0.2 | 10 | No | 10.1007/s00604-024-06263-x |
| 65 | 125 mmol/L Na-phosphate | 5.0 | 3 | 0.333 | No | 10.1038/s41531-025-00875-7 |
| 66 | Na-acetate | 4.0 | 0.5 | 0.1 | No | 10.1007/s41664-022-00241-z |
| 67 | 7.2 mmol/L Na-acetate | 5.5 | 0.6 | NS | No | 10.1186/s12951-023-01946-8 |
| 68 | Na-acetate | 3.8 | 0.166 | NS | No | 10.1007/s12161-023-02519-z |
| 69 | 200 mmol/L Na-acetate | 3.0 | NS | NS | No | 10.1007/s00604-024-06946-5 |
| 70 | Na-acetate | NS | 0.015 | 0.105 | No | 10.1007/s00604-025-07519-w |
| 71 | 170 mmol/L Na-acetate | 5.0 | 0.33 | 3.3 | No | 10.1007/s00604-023-05636-y |
| 72 | Na-acetate | 5.0 | 0.1 | 0.024 | No | 10.1007/s00216-022-04404-w |
| 73 | Na-acetate | 4.0 | 0.2 | 0.2 | No | 10.1038/s41598-025-01998-w |
| 74 | Na-acetate | 4.0 | 10 | 10 | No | 10.1007/s00604-025-07580-5 |
| 75 | 100 mmol/L Na-acetate | NS | 0.3 | 20 | No | 10.1016/j.microc.2022.107514 |
| 76 | 100 mmol/L Na-acetate | 4.0 | 2 | 7.5 | No | 10.1016/j.aca.2022.340493 |
| 77 | Citrate | NS | 0.4 | 0.8 | No | 10.1016/j.snb.2024.136484 |
| 78 | 180 mmol/L Na-acetate | 3.0 | 0.2 | 0.2 | No | 10.1039/D4SC00469H |
| 79 | Tris-HCl | 7.0 | 0.166 | 1.66 | No | 10.1016/j.jpba.2023.115922 |
| 80 | NS | NS | 2 | 0.216 | No | 10.1016/j.aca.2024.342701 |
| 81 | 200 mmol/L Na-acetate | 5.0 | 0.3 | 0.8 | No | 10.1016/j.bios.2024.116271 |
| 82 | 20 mmol/L Na-acetate | 4.0 | 1 | 0.1 | No | 10.1016/j.colsurfb.2023.113640 |
| 83 | 20 mmol/L Na-acetate | 4.0 | 2 | 0.1 | No | 10.1016/j.jmat.2022.04.011 |
| 84 | Na-acetate | 3.8 | 0.5 | 2.5 | No | 10.1016/j.cej.2024.155144 |
| 85 | 200 mmol/L Na-acetate | 4.0 | 5 | 5 | No | - 10.1016/j.microc.2024.110523 |
| 86 | 41.3 mmol/L Na-acetate | 4.0 | 1.18 | 11.8 | No | 10.1016/j.cej.2024.153326 |
| 87 | Phosphate | 4.0 | 0.25 | 50 | No | 10.1007/s00604-022-05576-z |
| 88 | 158 mmol/L Na-acetate | 4.0 | 0.026 | 5.26 | No | 10.1007/s00216-022-04074-8 |
| 89 | 85 mmol/L Na-acetate | 5.0 | 0.33 | 16.6 | No | 10.1007/s00604-025-07432-2 |
| 90 | Na-acetate | 4.0 | 0.1 | 25 | No | 10.1007/s00216-022-04100-9 |
| 91 | Na-acetate | 2.0 | 0.38 | 0.011 | No | 10.1007/s00604-024-06261-z |
| 92 | 90 mmol/L Na-acetate | 4.2 | 1 | 0.01 | No | 10.1007/s00604-022-05556-3 |
| 93 | 10 mmol/L PBS | 4.0 | 0.8 | 8 | No | 10.1007/s10853-024-09991-w |
| 94 | 90 mmol/L Na-acetate | 4.0 | 0.5 | 2.5 | No | 10.1016/j.foodchem.2023.137946 |
| 95 | H2O | NS | 0.131 | 6.58 | No | 10.1016/j.foodchem.2024.138788 |
| 96 | NS | 4.0 | 0.5 | 10 | No | 10.1016/j.aca.2020.08.015 |
| 97 | H2O | NS | 1.11 | 4.44 | No | 10.1021/acsomega.2c04129 |
| 98 | Na-Phosphate | 4.0 | 0.8 | 100 | No | - 10.1007/s00604-018-2957-5 |
| 99 | 30 mmol/L Na-acetate | 3.6 | 0.64 | 1.28 | No | 10.3390/nano10102045 |
| 100 | Phosphate | 4.0 | 0.1 | NS | No | 10.3390/molecules29092117 |
| 101 | 176 mmol/L Na-acetate | 4.0 | 0.176 | 0.006 | No | 10.1007/s10876-024-02646-5 |
| 102 | Na-acetate | NS | 0.146 | 2.38 | No | 10.1007/s00604-024-06444-8 |
| 103 | 90 mmol/L Na-acetate | 4.0 | 1 | 1 | 1 mmol/L DTPA | 10.3390/app16041858 |

1 Not specified

**Table S3.** pH values in papers reporting high and low non-specific oxidation of TMB with acetate buffer: descriptive statistics for **Fig. XA**

| **Non-specific oxidation** | High | Low |
| --- | --- | --- |
| **Number of values** | 86 | 70 |
| **Minimum** | 2.5 | 2 |
| **25% Percentile** | 3.5 | 3.8 |
| **Median** | 4 | 4 |
| **75% Percentile** | 4 | 4 |
| **Maximum** | 5.2 | 5.5 |
| **Mean** | 3.872 | 3.989 |
| **Std. Deviation** | 0.4495 | 0.6159 |
| **Std. Error of Mean** | 0.04847 | 0.07361 |

**Table S4.** TMB concentrations in papers reporting high and low non-specific oxidation of TMB with acetate buffer: descriptive statistics for **Fig. XB**

| **Non-specific oxidation** | High | Low |
| --- | --- | --- |
| **Number of values** | 79 | 71 |
| **Minimum** | 0.04400 | 0.01500 |
| **25% Percentile** | 0.2500 | 0.1760 |
| **Median** | 0.5000 | 0.3000 |
| **75% Percentile** | 1.000 | 0.5400 |
| **Maximum** | 20.00 | 10.00 |
| **Mean** | 1.354 | 0.6415 |
| **Std. Deviation** | 2.823 | 1.315 |
| **Std. Error of Mean** | 0.3176 | 0.1560 |

**Table S5.** H2O2 concentrations in papers reporting high and low non-specific oxidation of TMB with acetate buffer: descriptive statistics for **Fig. XC**

| **Non-specific oxidation** | High | Low |
| --- | --- | --- |
| **Number of values** | 78 | 68 |
| **Minimum** | 0.050 | 0.006 |
| **25% Percentile** | 0.500 | 0.206 |
| **Median** | 3.330 | 2.440 |
| **75% Percentile** | 10.00 | 10.00 |
| **Maximum** | 1200 | 150.0 |
| **Mean** | 46.59 | 12.83 |
| **Std. Deviation** | 181.1 | 27.66 |
| **Std. Error of Mean** | 20.50 | 3.354 |

**Equation S1.** Regression model for the factors influencing non-specific TMB oxidation

**
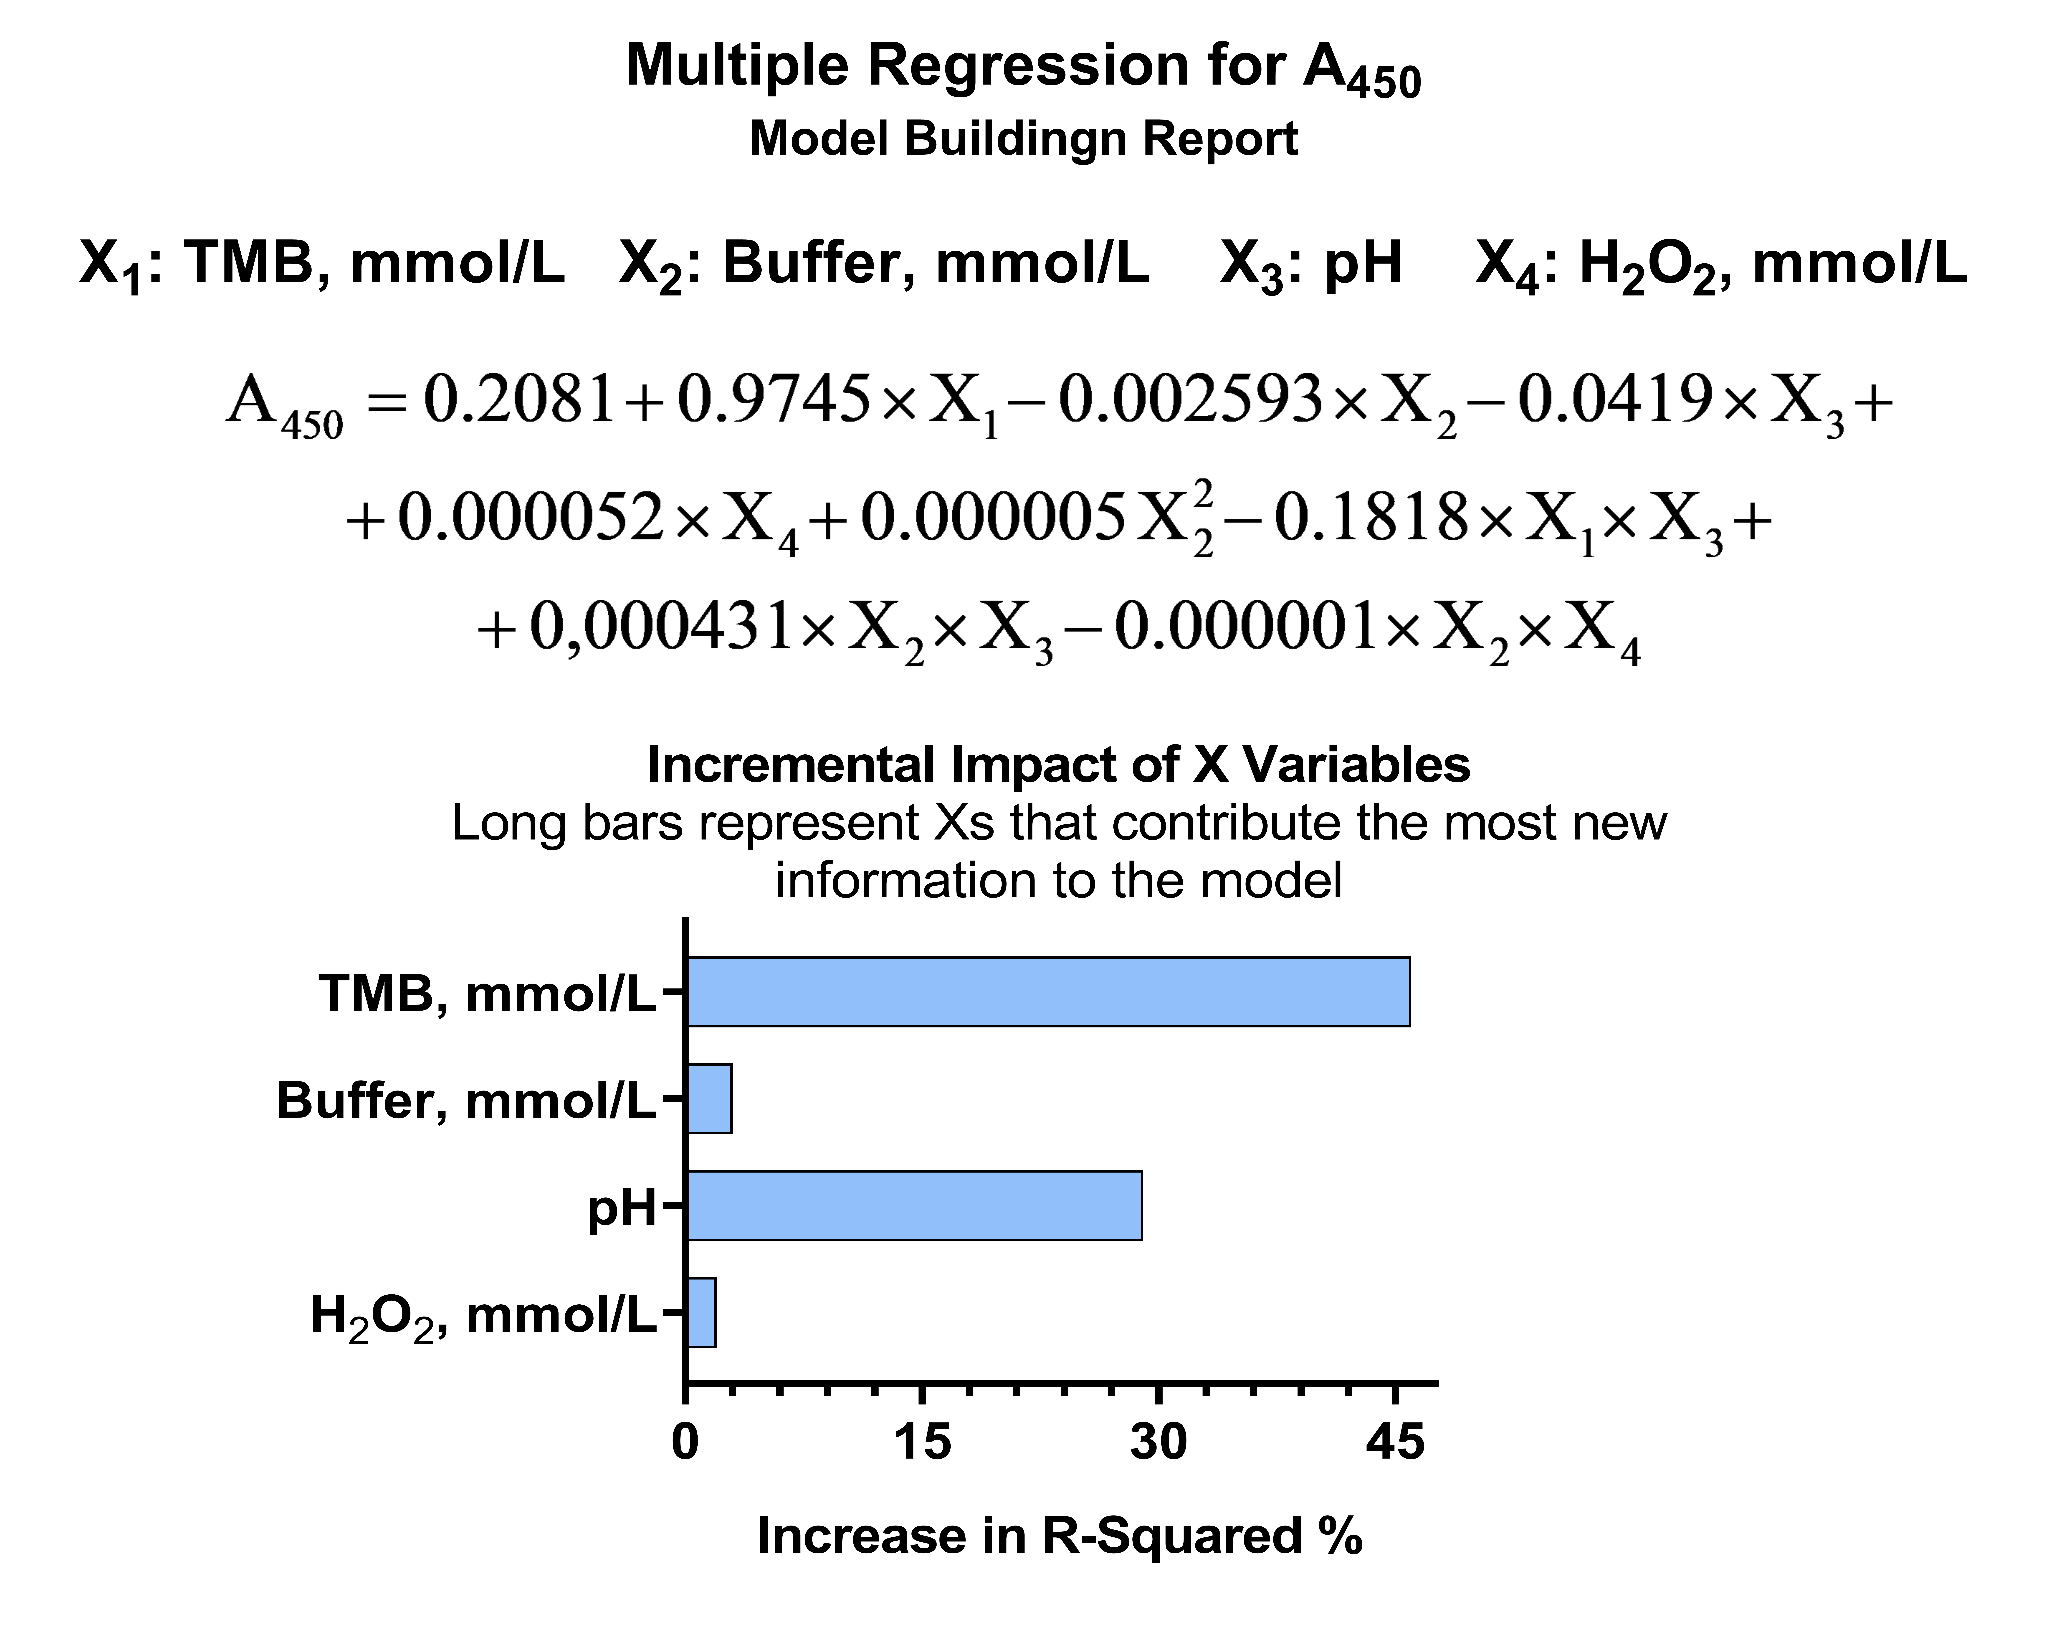
**

**Fig. S1.** Relative importance of factors influencing non-specific TMB oxidation. Data are presented as the relative contribution of each variable to the total variance in the regression model.

**
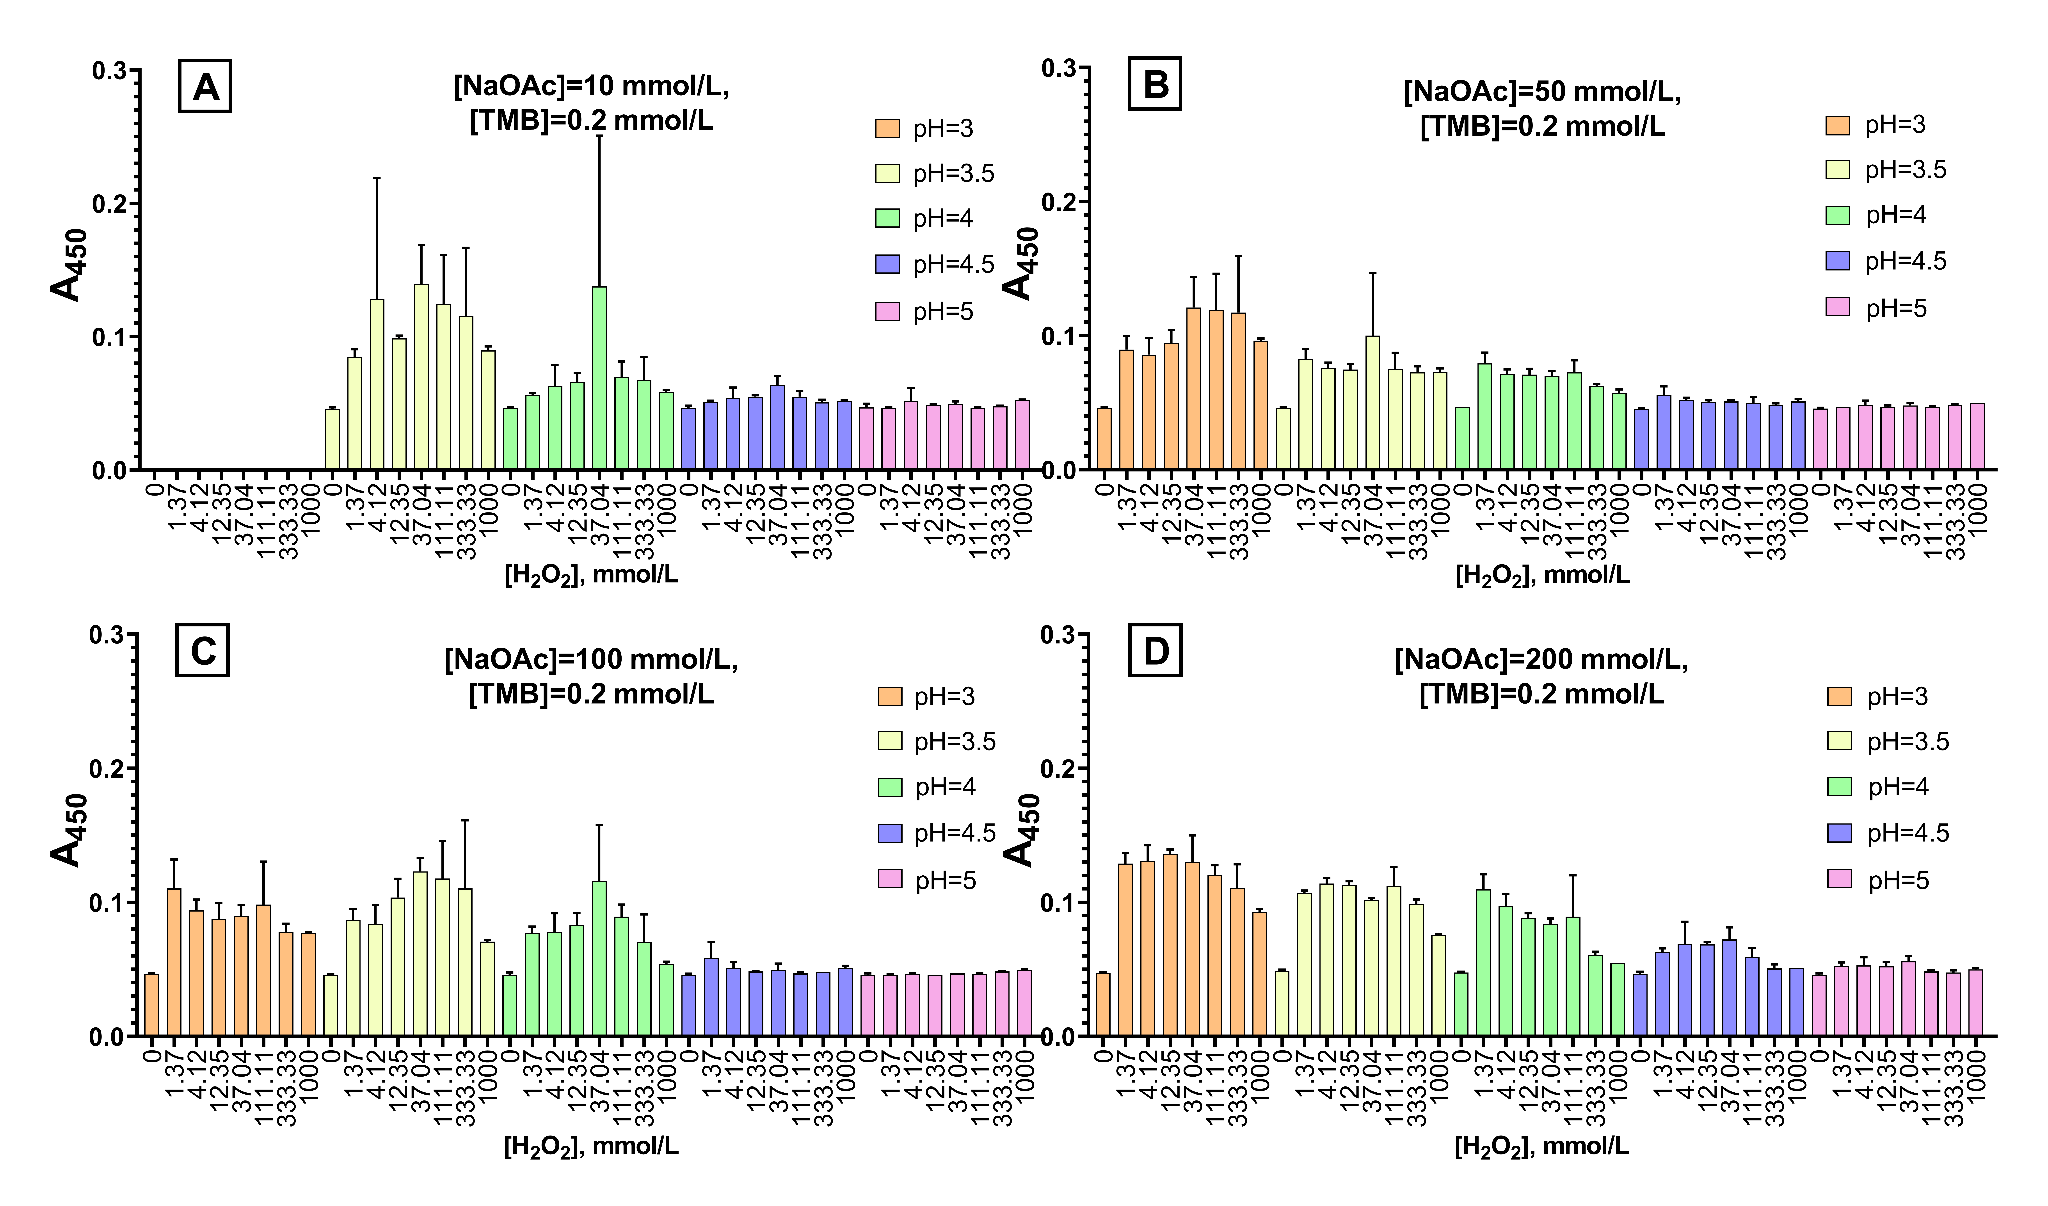
**

**Fig. S2.** The effect of buffer concentration on non-specific TMB oxidation. The influence of sodium acetate buffer molarity was tested at a fixed [TMB] of 0.2 mmol/L, [H2O2] of 100 mmol/L, pH 4.0, and 10% DMSO (v/v). Data are presented as the mean ± standard deviation (n = 3) for the following buffer concentrations: **A** 10 mmol/L, **B** 50 mmol/L, **C** 100 mmol/L, and **D** 200 mmol/L.

**
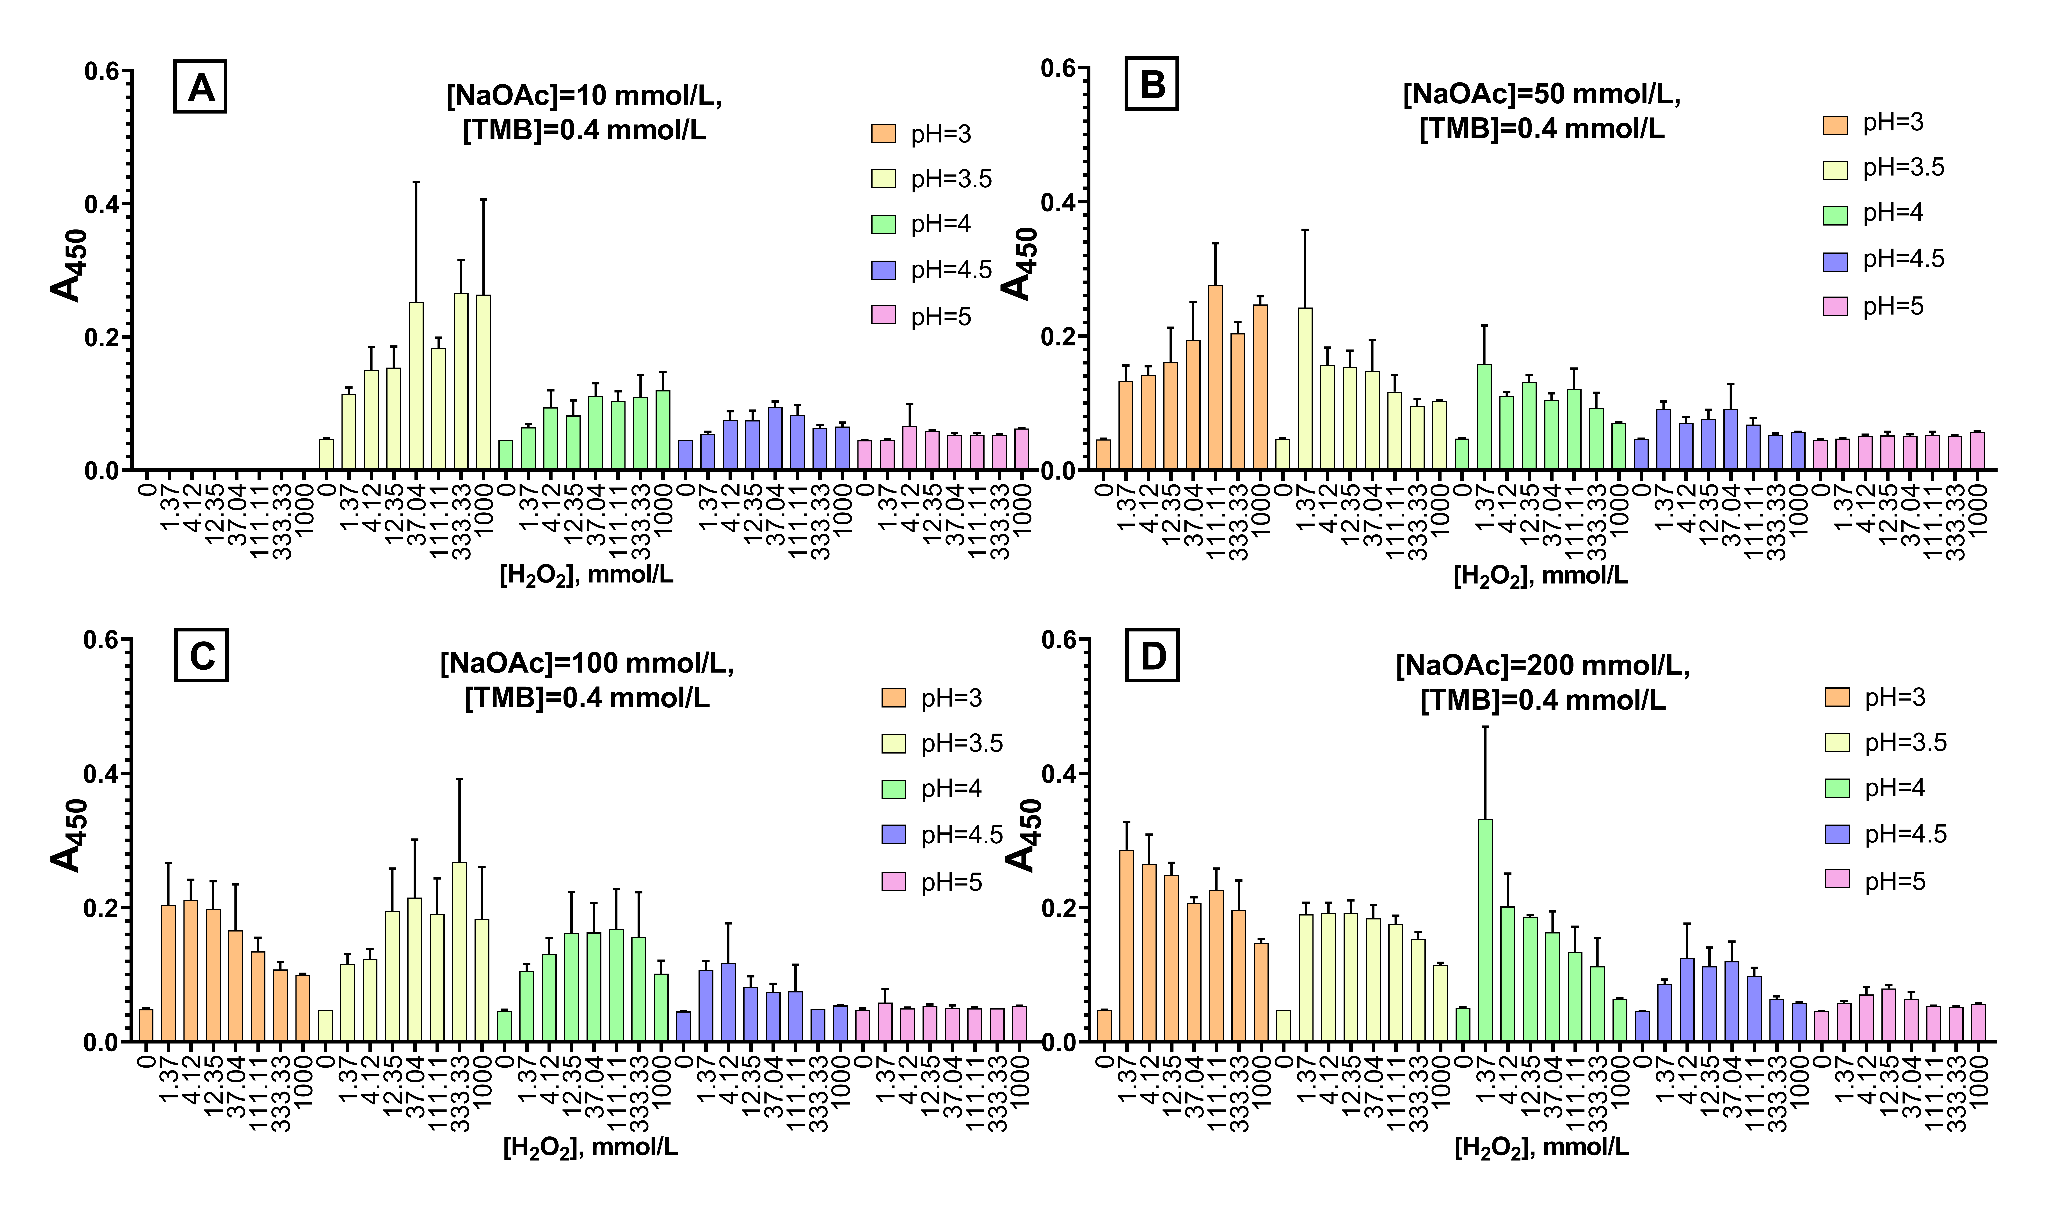
**

**Fig. S3.** The effect of buffer concentration on non-specific TMB oxidation. The influence of sodium acetate buffer molarity was tested at a fixed [TMB] of 0.4 mmol/L, [H2O2] of 100 mmol/L, pH 4.0, and 10% DMSO (v/v). Data are presented as the mean ± standard deviation (n = 3) for the following buffer concentrations: **A** 10 mmol/L, **B** 50 mmol/L, **C** 100 mmol/L, and **D** 200 mmol/L.

**
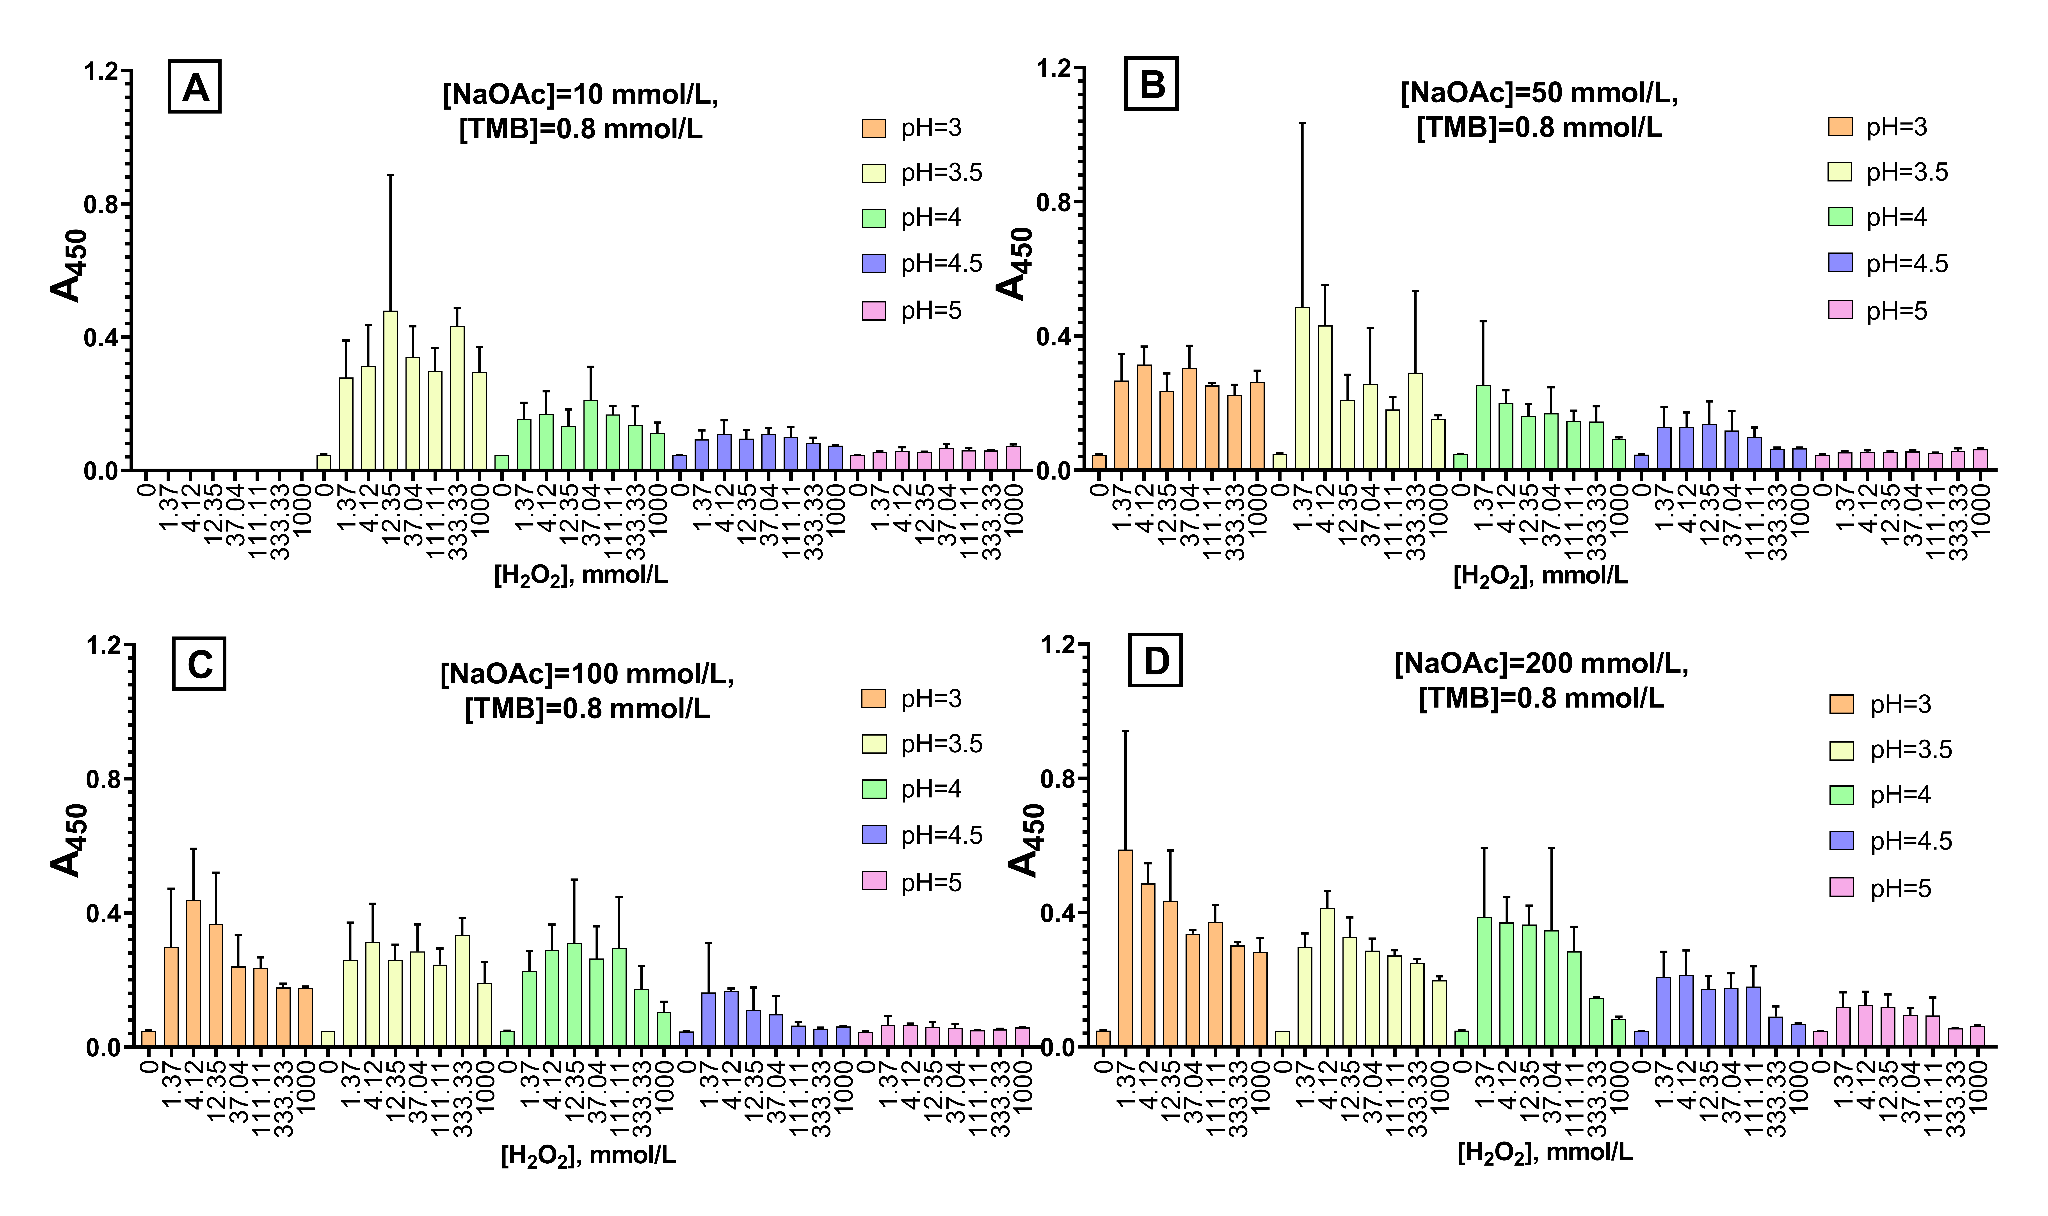
**

**Fig. S4.** The effect of buffer concentration on non-specific TMB oxidation. The influence of sodium acetate buffer molarity was tested at a fixed [TMB] of 0.8 mmol/L, [H2O2] of 100 mmol/L, pH 4.0, and 10% DMSO (v/v). Data are presented as the mean ± standard deviation (n = 3) for the following buffer concentrations: **A** 10 mmol/L, **B** 50 mmol/L, **C** 100 mmol/L, and **D** 200 mmol/L.

**
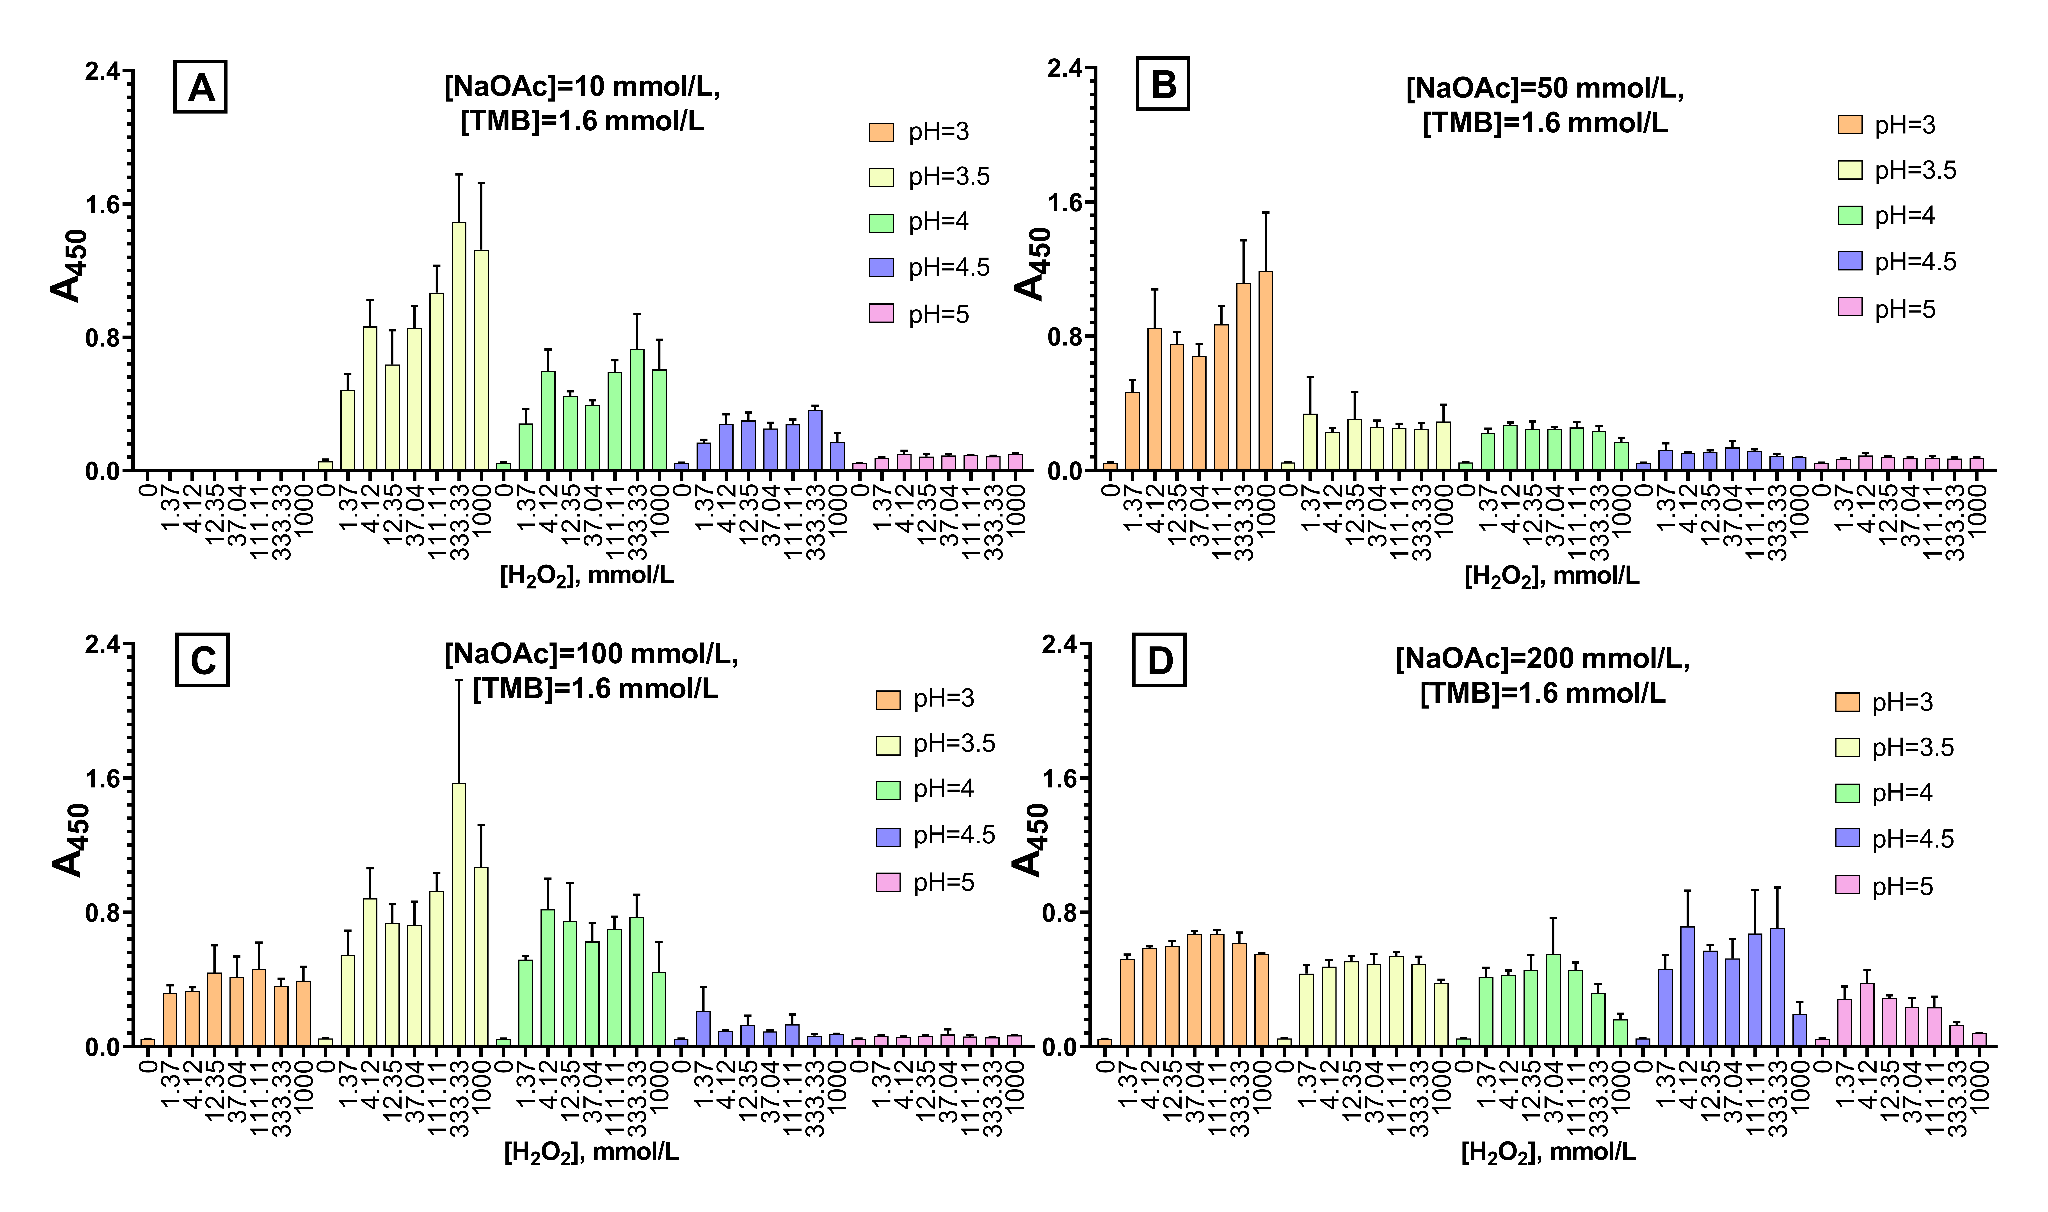
**

**Fig. S5.** The effect of buffer concentration on non-specific TMB oxidation. The influence of sodium acetate buffer molarity was tested at a fixed [TMB] of 1.6 mmol/L, [H2O2] of 100 mmol/L, pH 4.0, and 10% DMSO (v/v). Data are presented as the mean ± standard deviation (n = 3) for the following buffer concentrations: **A** 10 mmol/L, **B** 50 mmol/L, **C** 100 mmol/L, and **D** 200 mmol/L.

## **
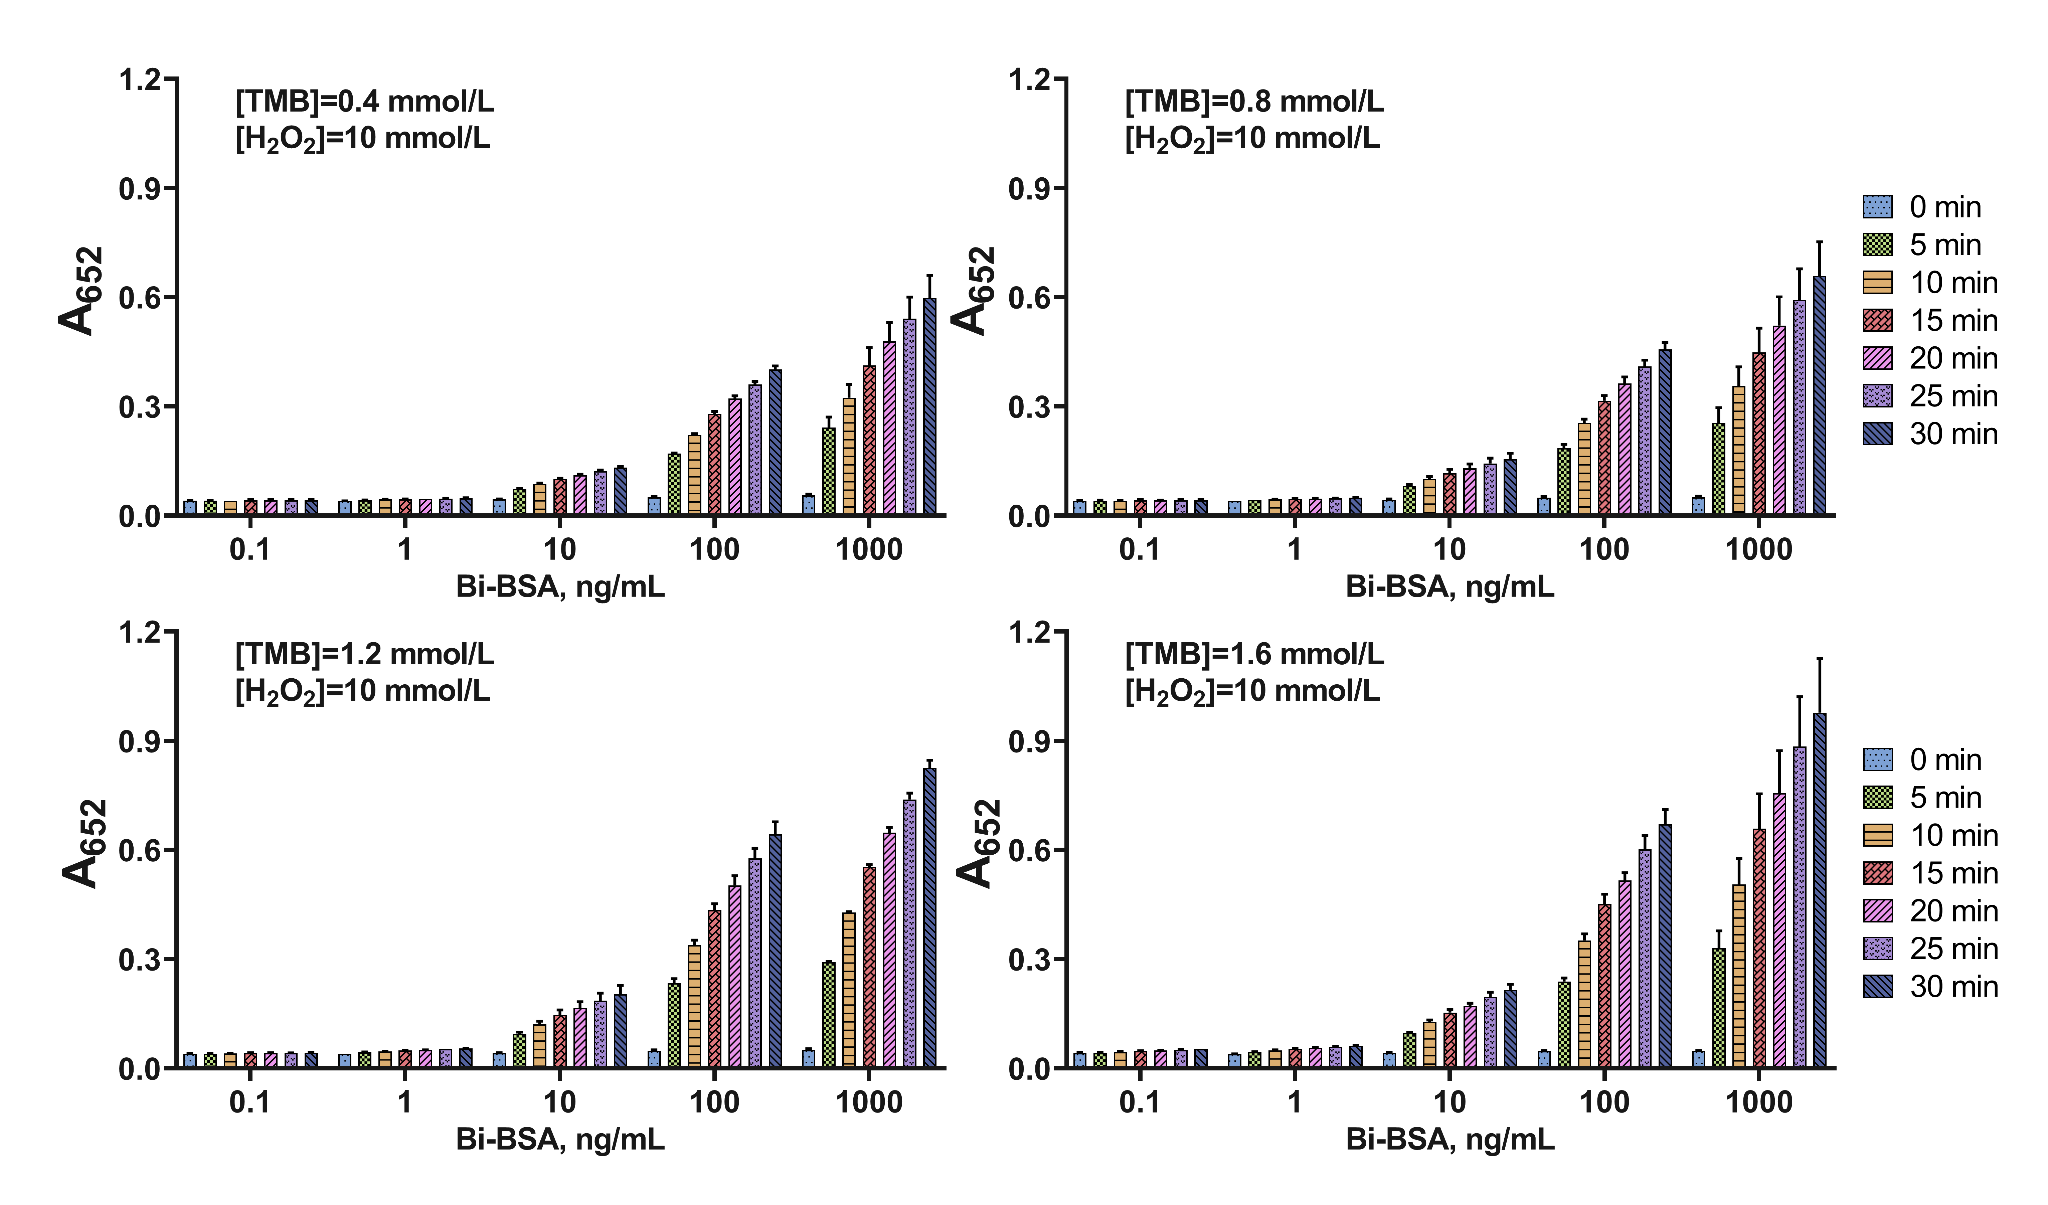
**

**Fig. S6.** Assay kinetics for the detection of Bi-BSA using Pt/Str conjugates. Signal intensity was recorded in 5-minute intervals after TMB addition. Composition of TMB solution: [TMB] = 0.4–1.6 mmol/L, [H2O2] = 10 mmol/L, 200 mmol/L Na-citrate buffer (pH 4.0), 10% DMSO (v/v). Data represent the mean ± SD (n = 3).

## **
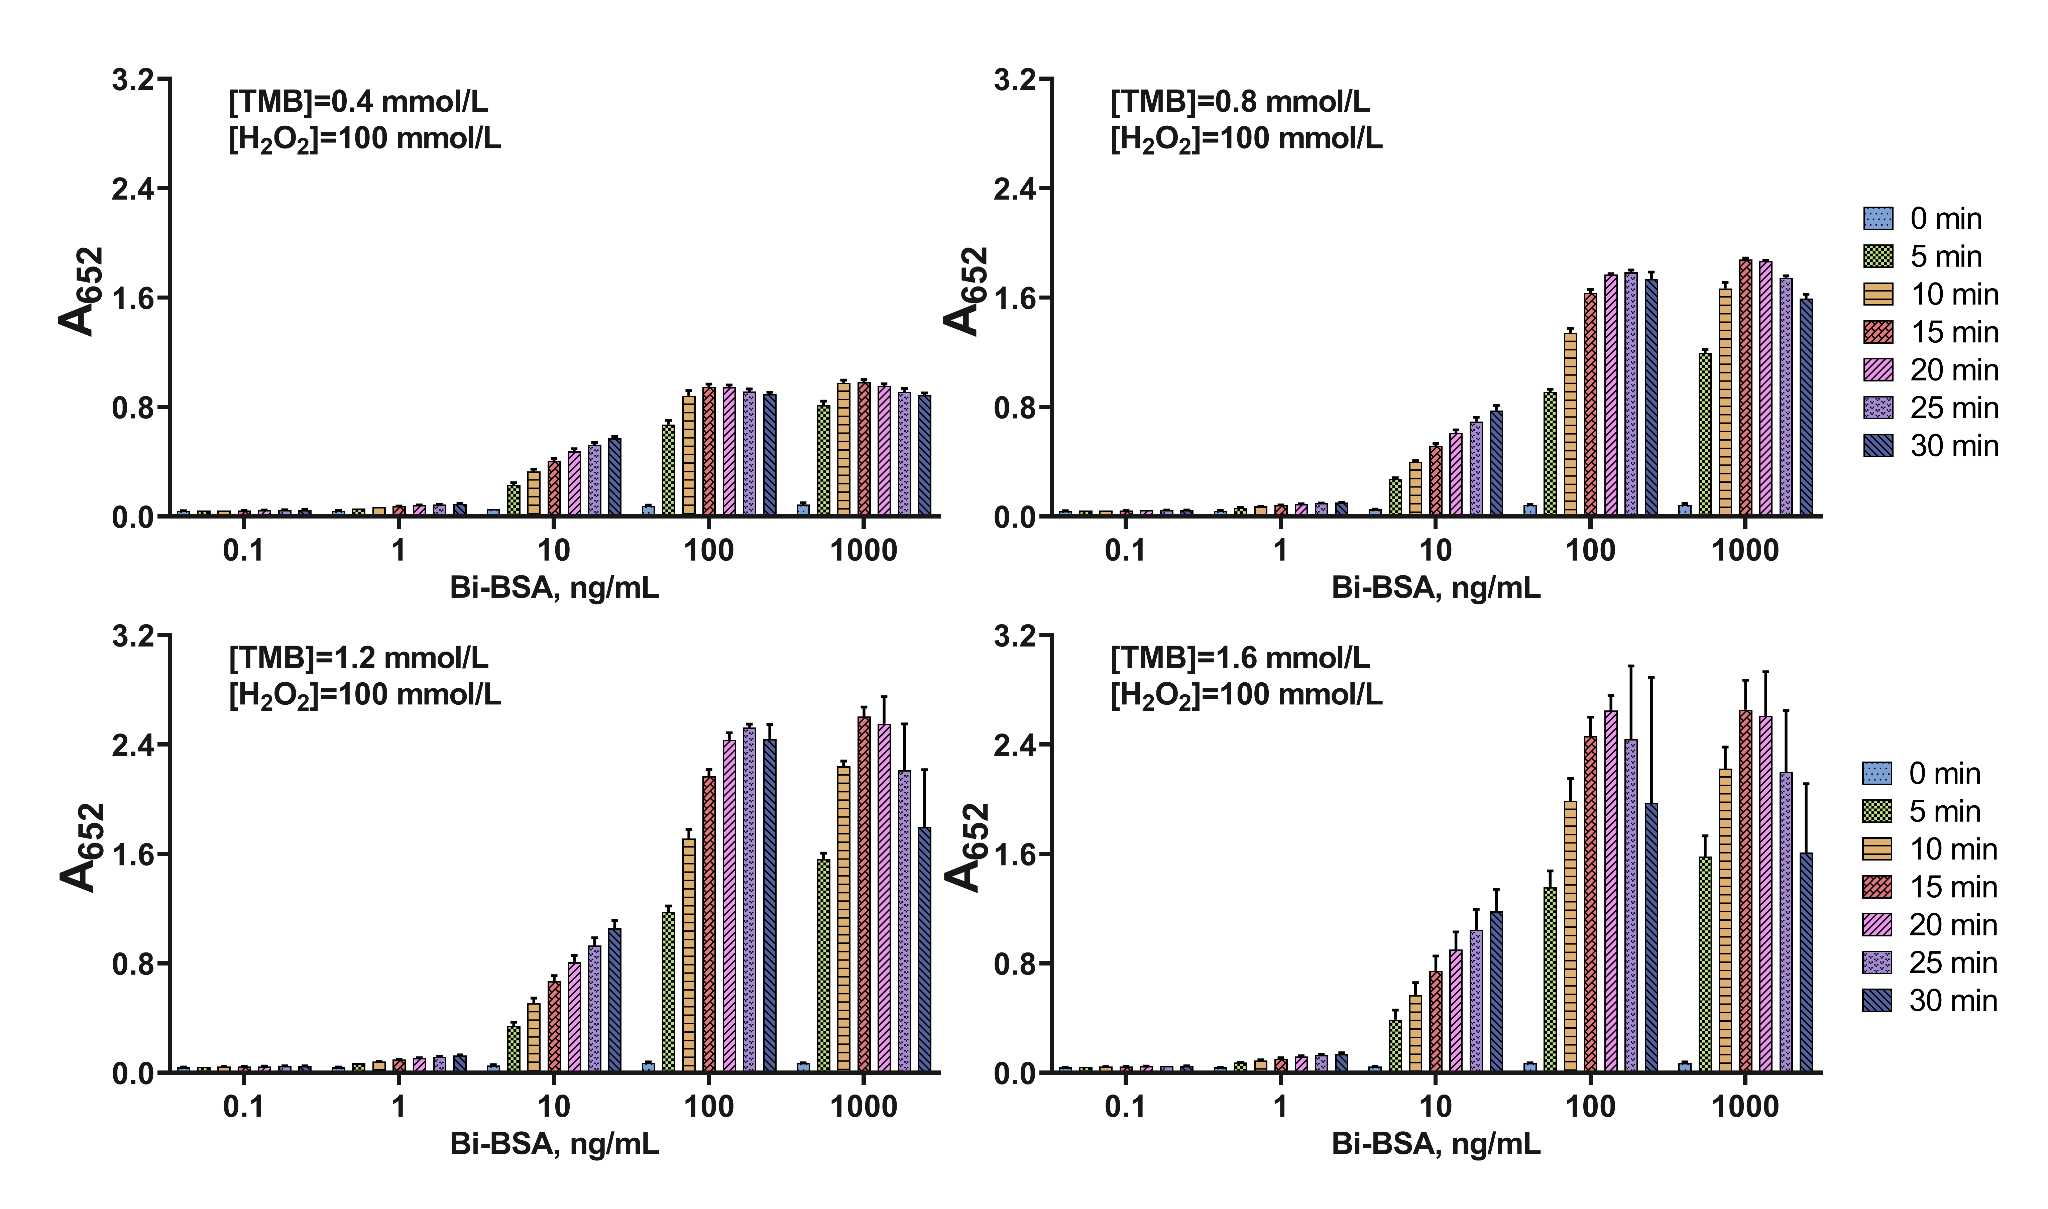
**

**Fig. S7.** Assay kinetics for the detection of Bi-BSA using Pt/Str conjugates. Signal intensity was recorded in 5-minute intervals after TMB addition. Composition of TMB solution: [TMB] = 0.4–1.6 mmol/L, [H2O2] = 100 mmol/L, 200 mmol/L Na-citrate buffer (pH 4.0), 10% DMSO (v/v). Data represent the mean ± SD (n = 3).


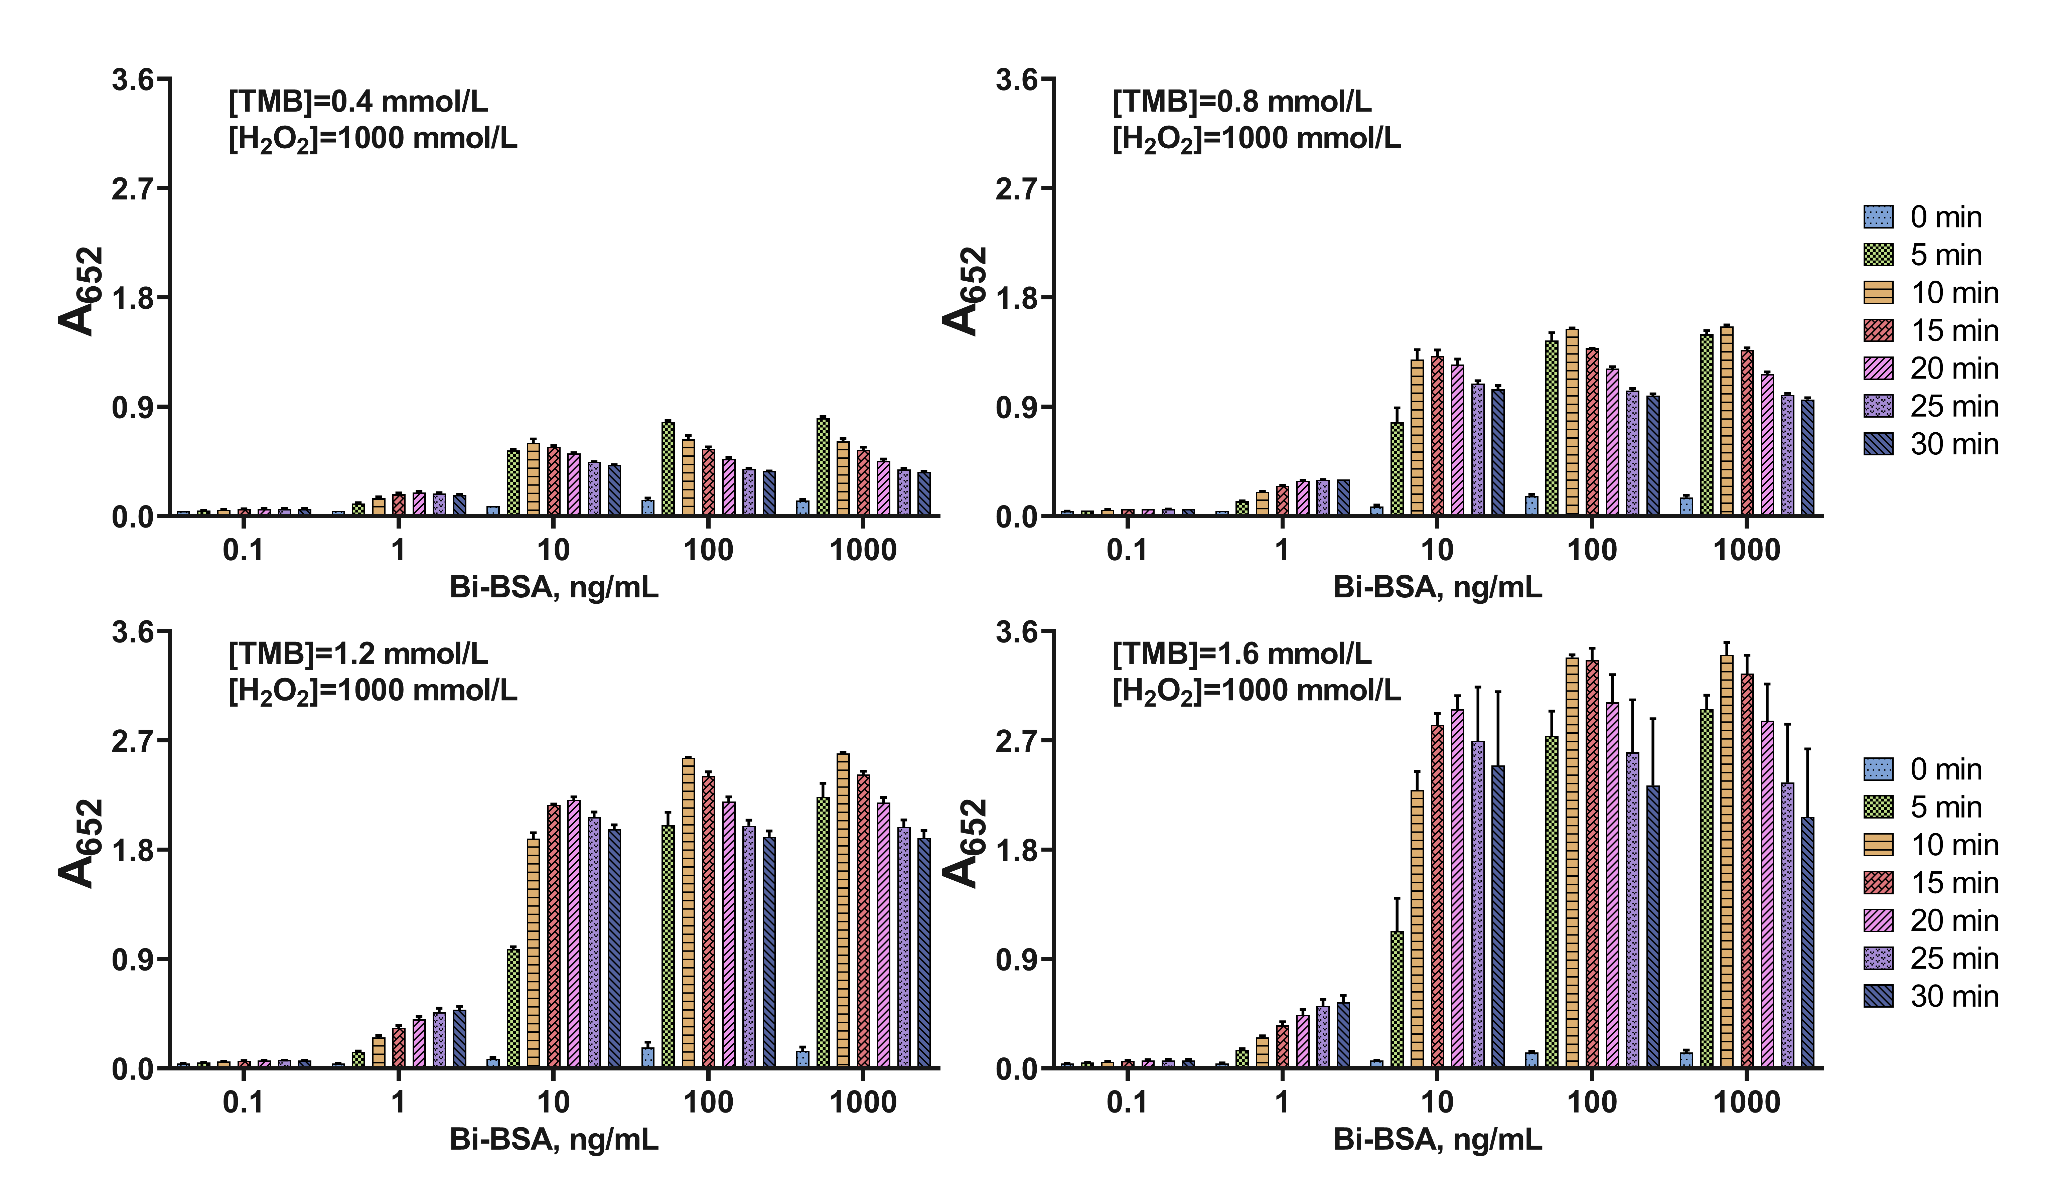


**Fig. S8.** Assay kinetics for the detection of Bi-BSA using Pt/Str conjugates. Signal intensity was recorded in 5-minute intervals after TMB addition. Composition of TMB solution: [TMB] = 0.4–1.6 mmol/L, [H2O2] = 1000 mmol/L, 200 mmol/L Na-citrate buffer (pH 4.0), 10% DMSO (v/v). Data represent the mean ± SD (n = 3).

**
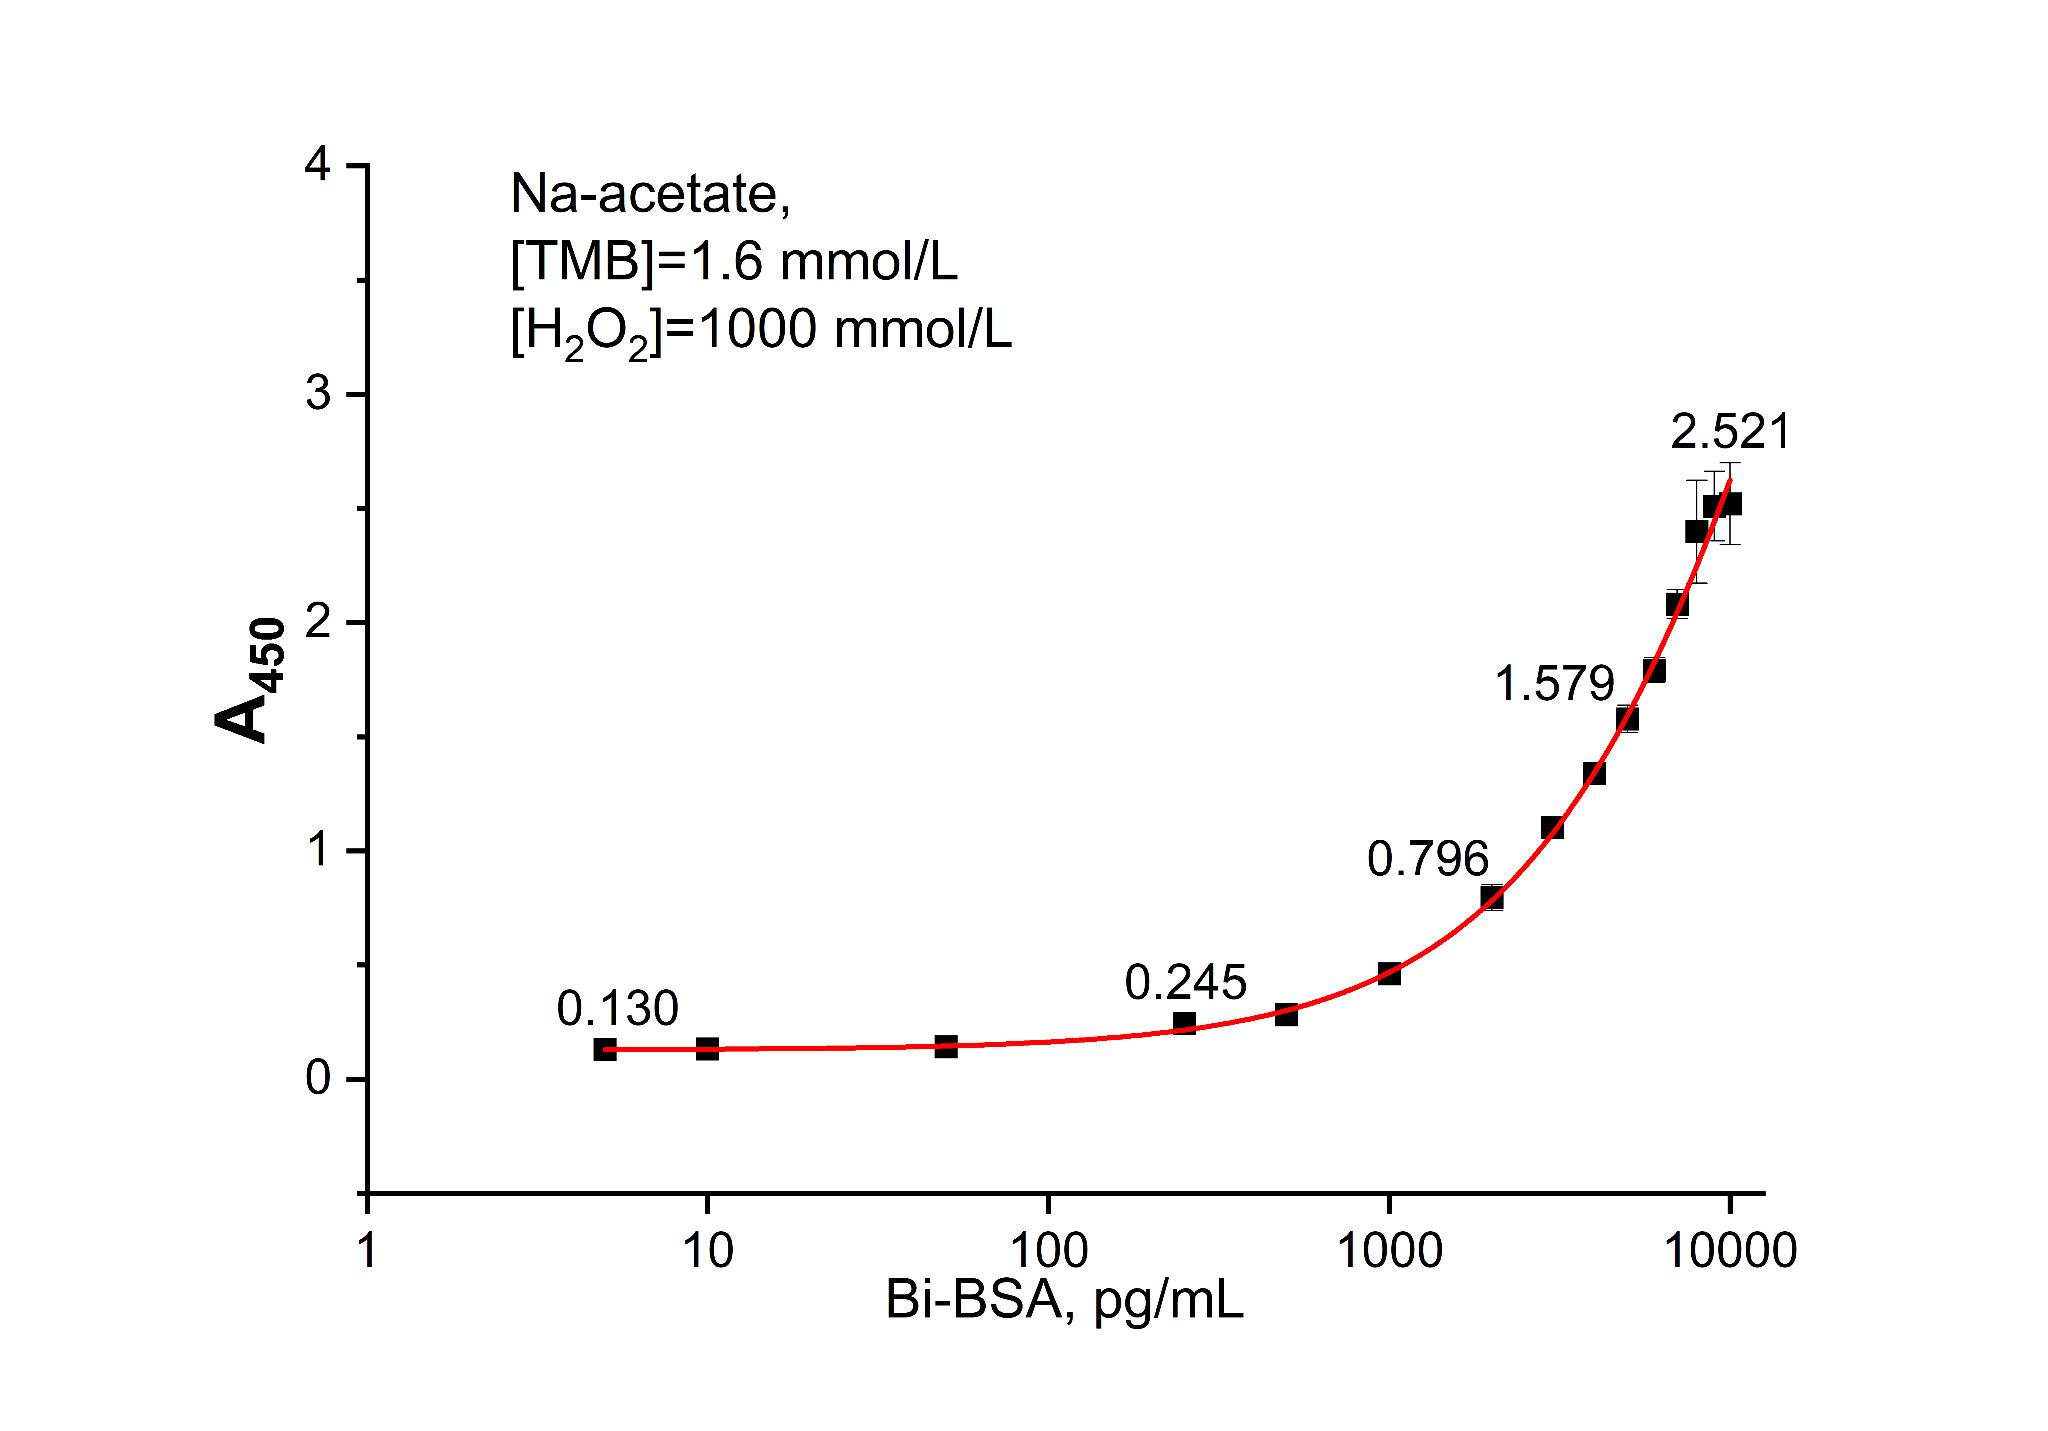
**

**Fig. S9.** Standard curve for the Bi-BSA assay. The curve was generated by fitting the calibration data to a four-parameter logistic model. The assay was performed under the following optimized reaction conditions: 100 mmol/L sodium acetate buffer (pH 4.0), [TMB] = 1.6 mmol/L, [H2O2] = 1000 mmol/L, and 10% DMSO (v/v). Data represent the mean ± standard deviation (n = 6).

**
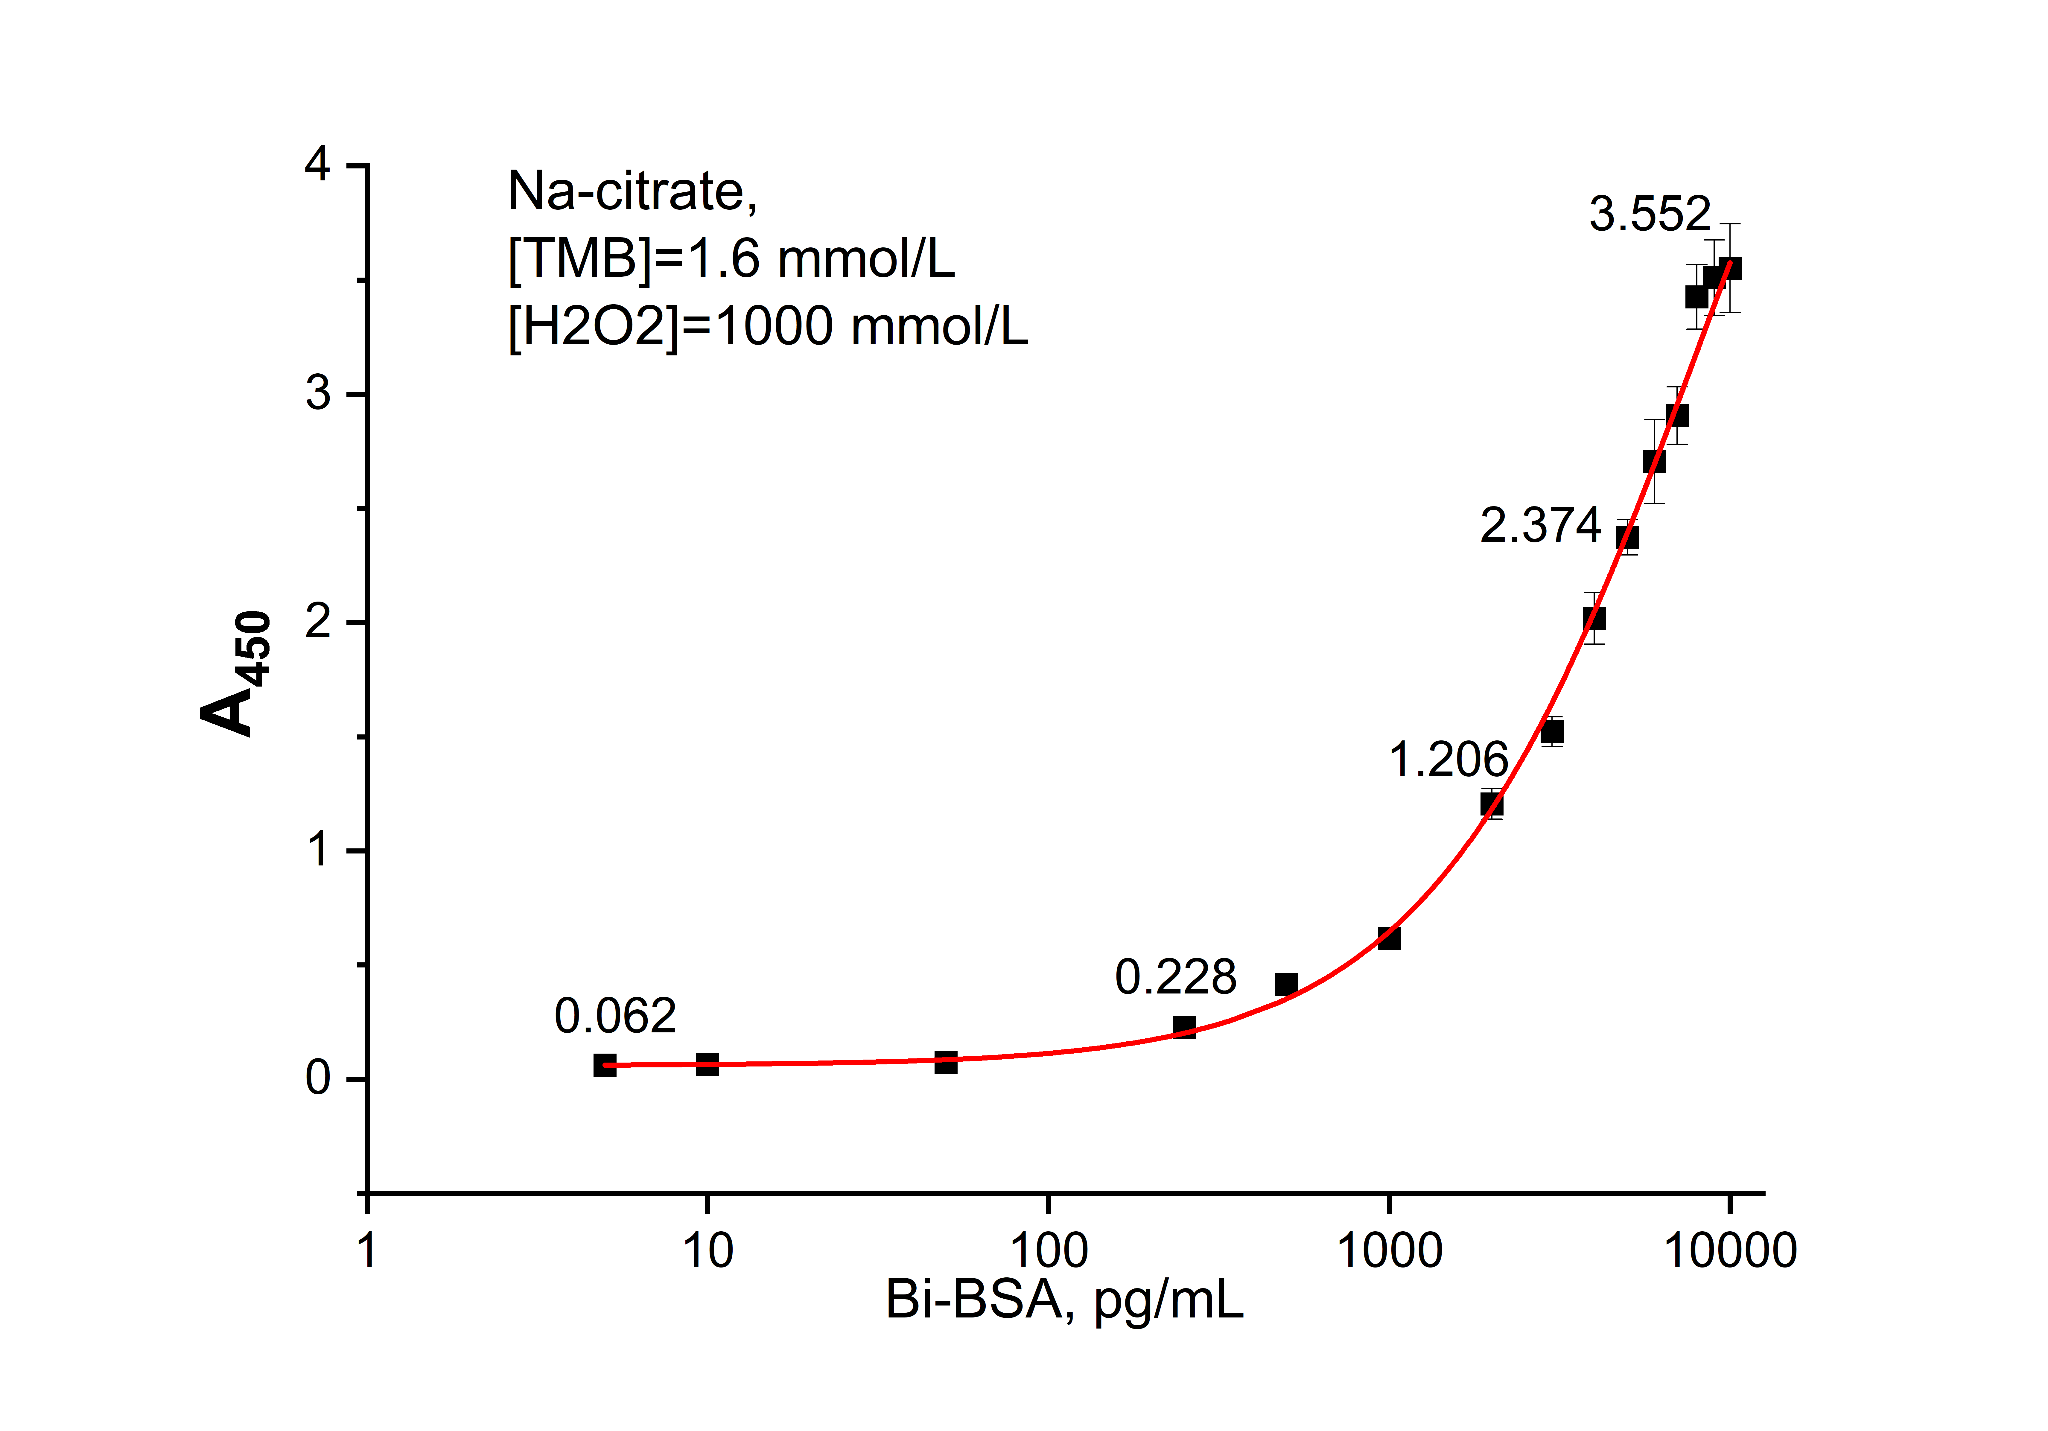
**

**Fig. S10.** Standard curve for the Bi-BSA assay. The curve was generated by fitting the calibration data to a four-parameter logistic model. The assay was performed under the following optimized reaction conditions: 100 mmol/L sodium citrate buffer (pH 4.0), [TMB] = 1.6 mmol/L, [H2O2] = 1000 mmol/L, and 10% DMSO (v/v). Data represent the mean ± standard deviation (n = 6).

**
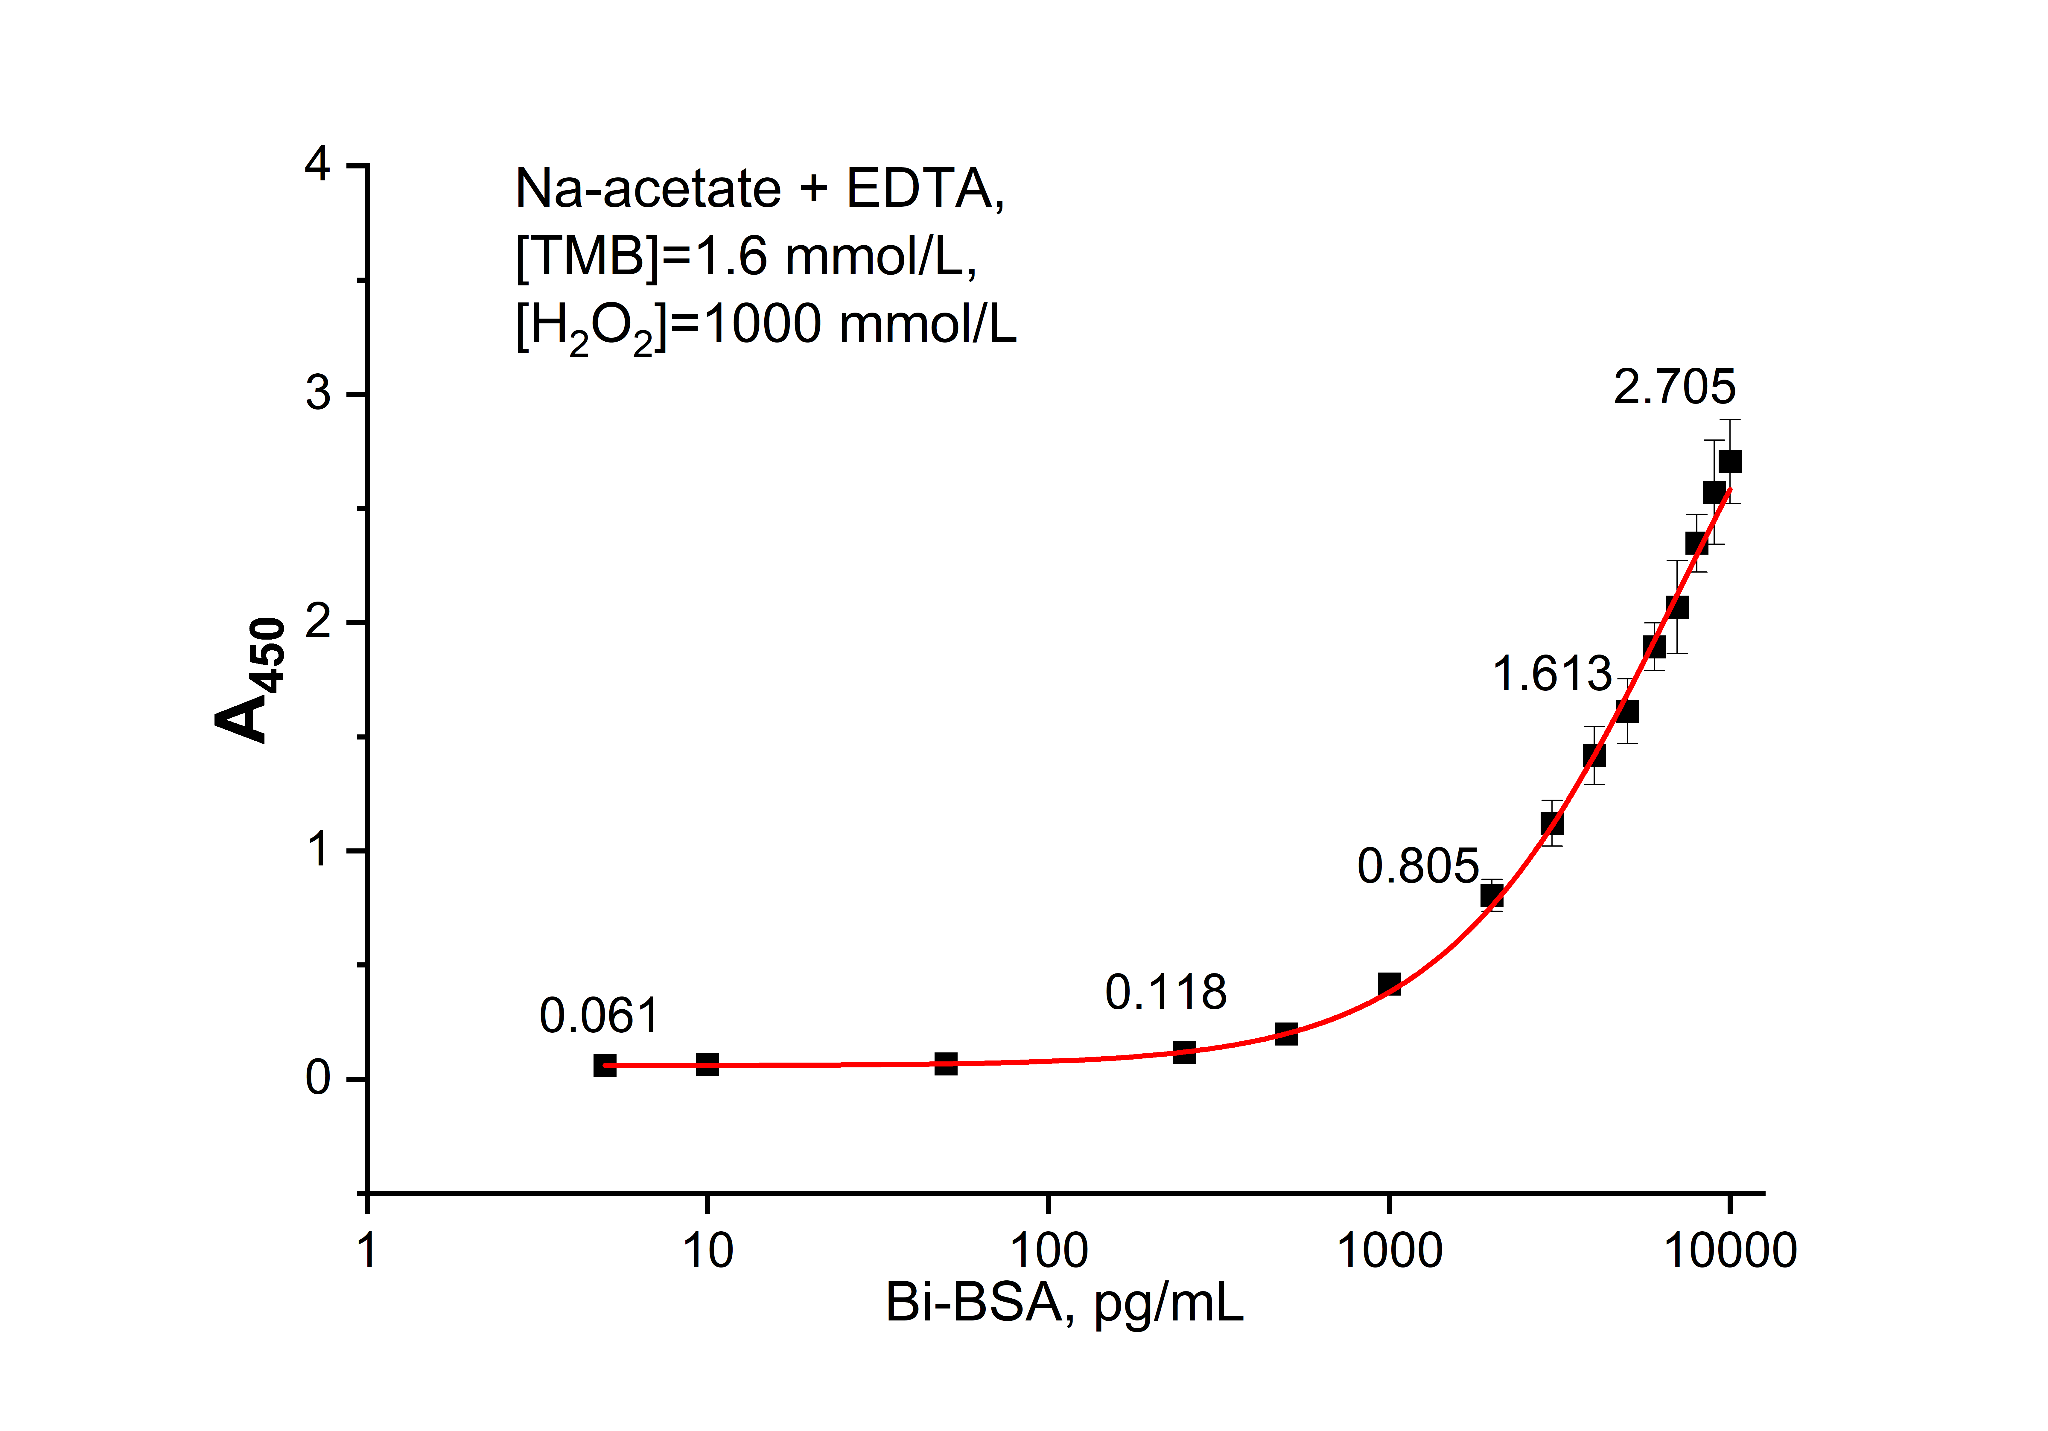
**

**Fig. S11.** Standard curve for the Bi-BSA assay. The curve was generated by fitting the calibration data to a four-parameter logistic model. The assay was performed under the following optimized reaction conditions: 100 mmol/L sodium acetate buffer (pH 4.0), [Na2EDTA] = 100 μmol/L, [TMB] = 1.6 mmol/L, [H2O2] = 1000 mmol/L, and 10% DMSO (v/v). Data represent the mean ± standard deviation (n = 6).

**
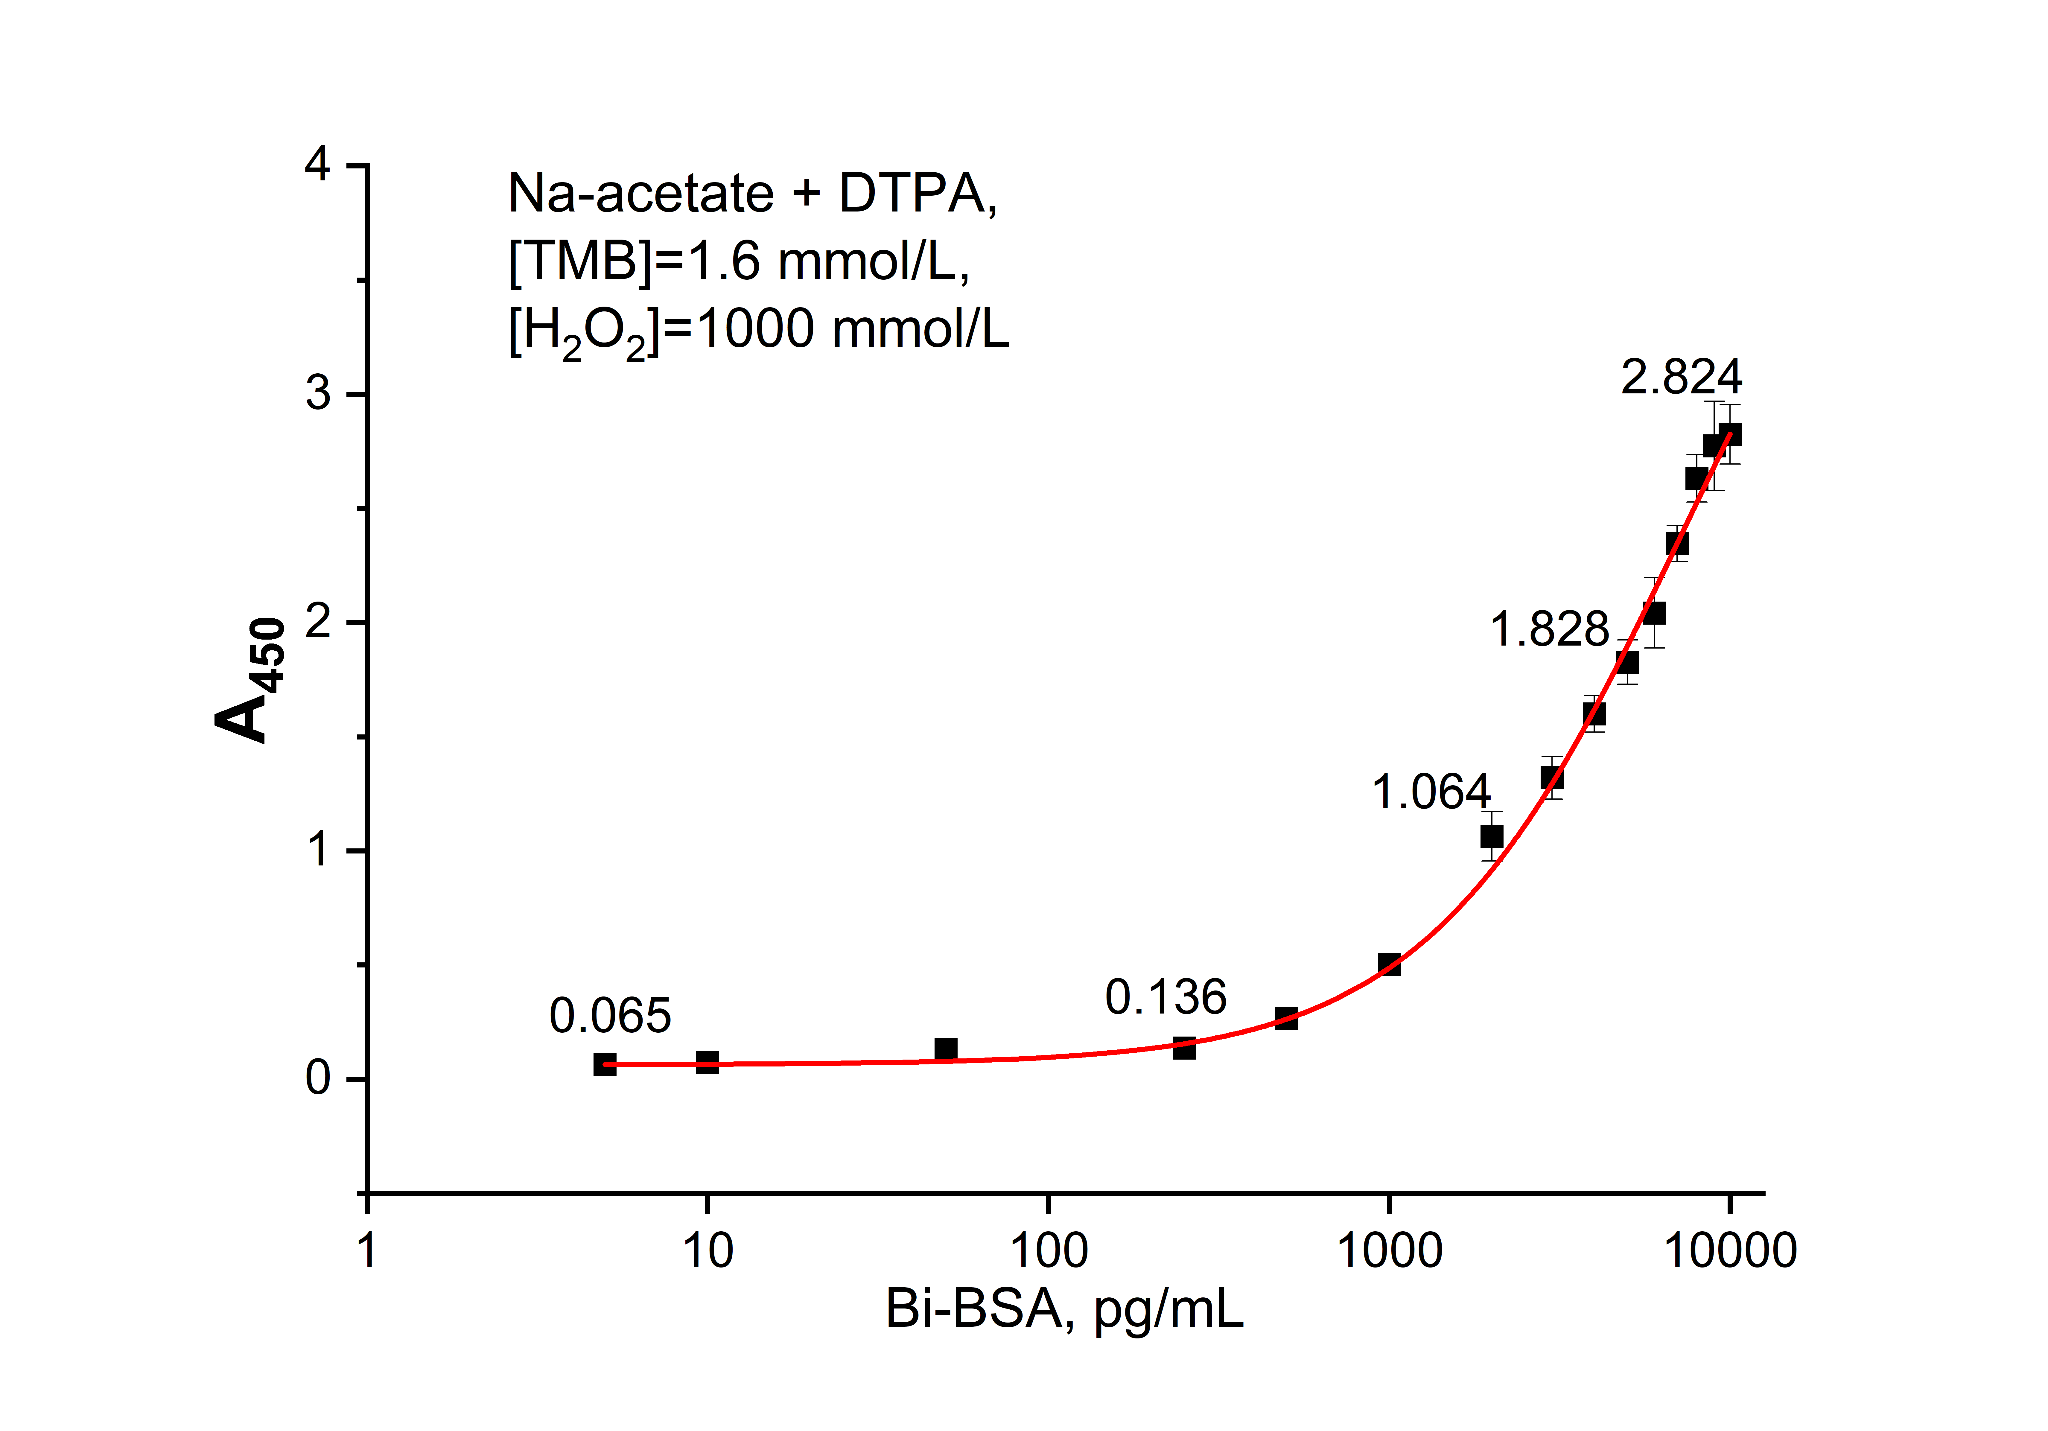
**

**Fig. S12.** Standard curve for the Bi-BSA assay. The curve was generated by fitting the calibration data to a four-parameter logistic model. The assay was performed under the following optimized reaction conditions: 100 mmol/L sodium acetate buffer (pH 4.0), [DTPA] = 100 μmol/L, [TMB] = 1.6 mmol/L, [H2O2] = 1000 mmol/L, and 10% DMSO (v/v). Data represent the mean ± standard deviation (n = 6).

**
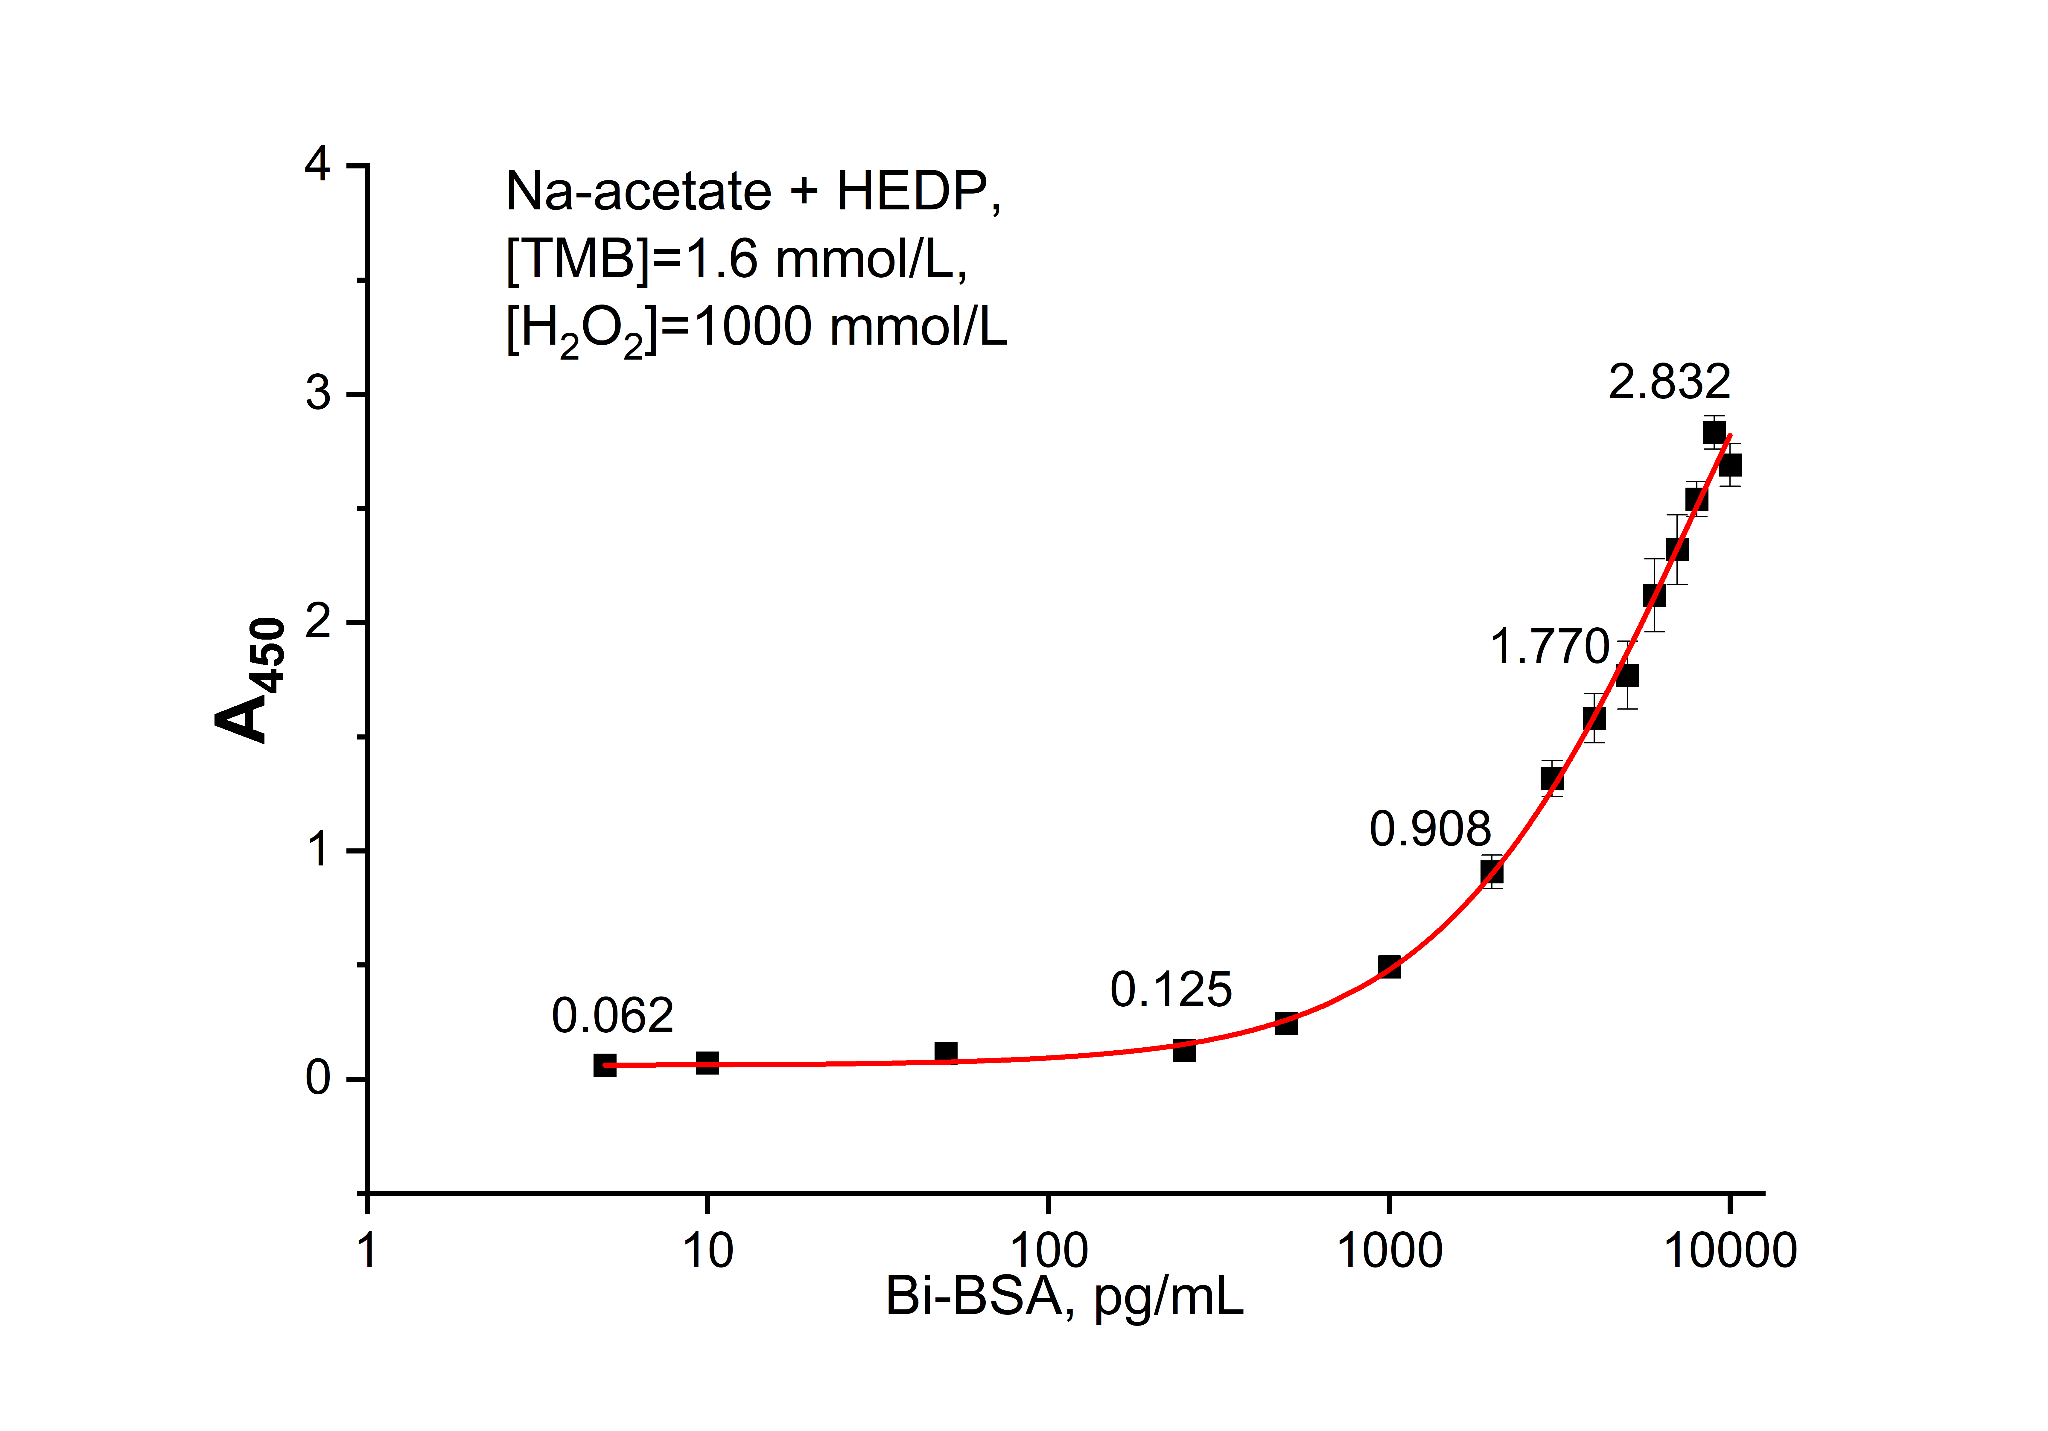
**

**Fig. S13.** Standard curve for the Bi-BSA assay. The curve was generated by fitting the calibration data to a four-parameter logistic model. The assay was performed under the following optimized reaction conditions: 100 mmol/L sodium acetate buffer (pH 4.0), [HEDP] = 100 μmol/L, [TMB] = 1.6 mmol/L, [H2O2] = 1000 mmol/L, and 10% DMSO (v/v). Data represent the mean ± standard deviation (n = 6).

**
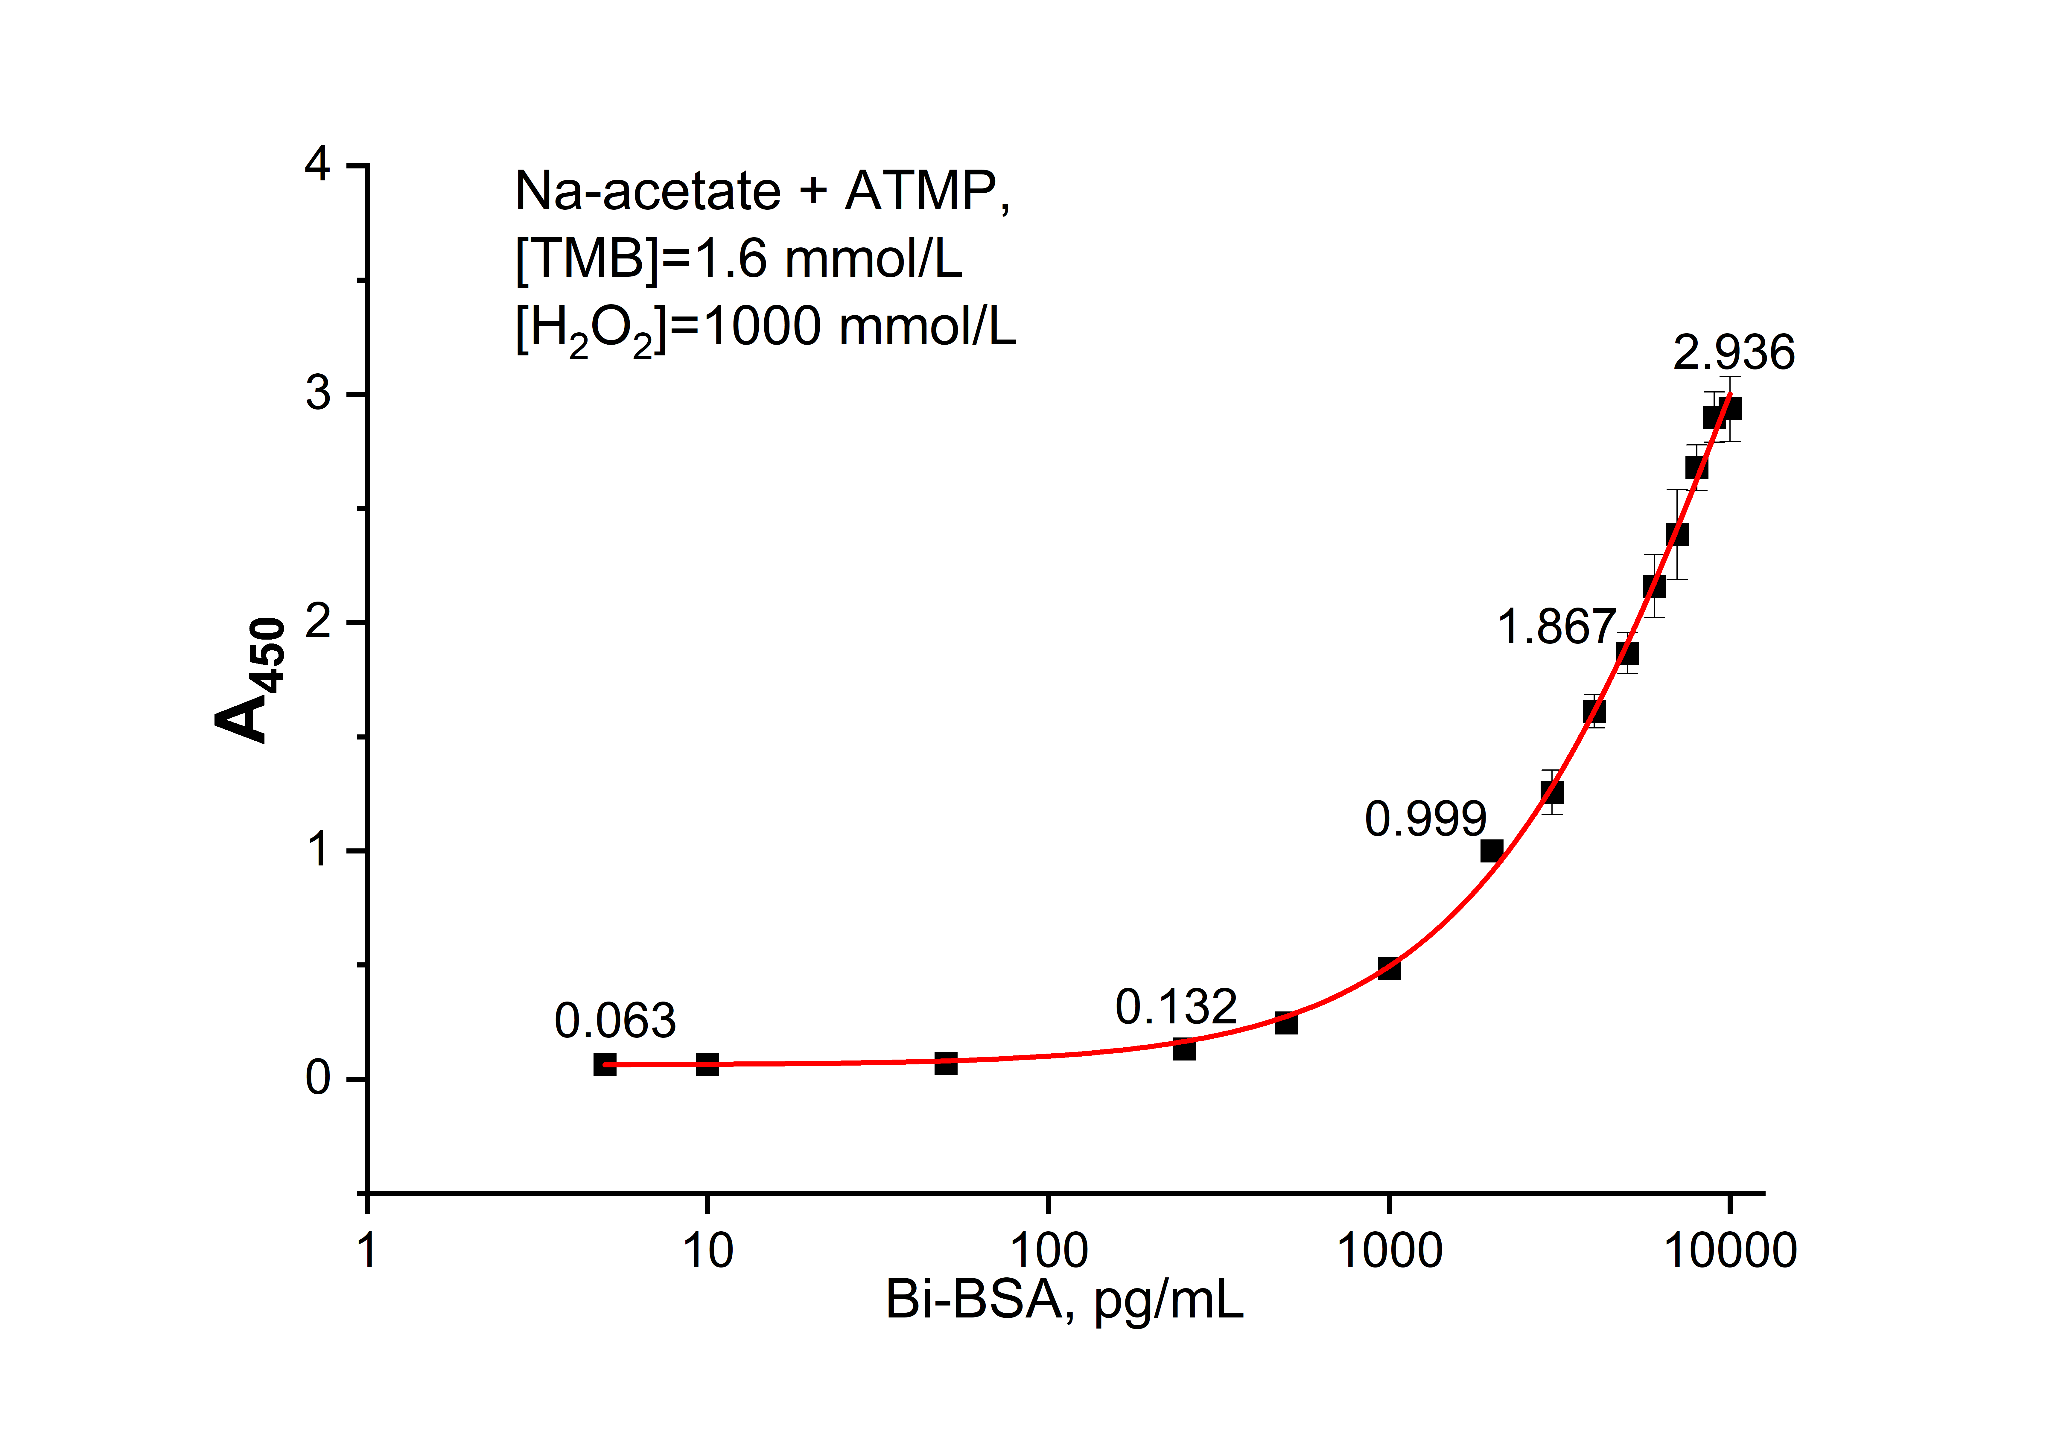
**

**Fig. S14.** Standard curve for the Bi-BSA assay. The curve was generated by fitting the calibration data to a four-parameter logistic model. The assay was performed under the following optimized reaction conditions: 100 mmol/L sodium acetate buffer (pH 4.0), [ATMP] = 100 μmol/L, [TMB] = 1.6 mmol/L, [H2O2] = 1000 mmol/L, and 10% DMSO (v/v). Data represent the mean ± standard deviation (n = 6).

**
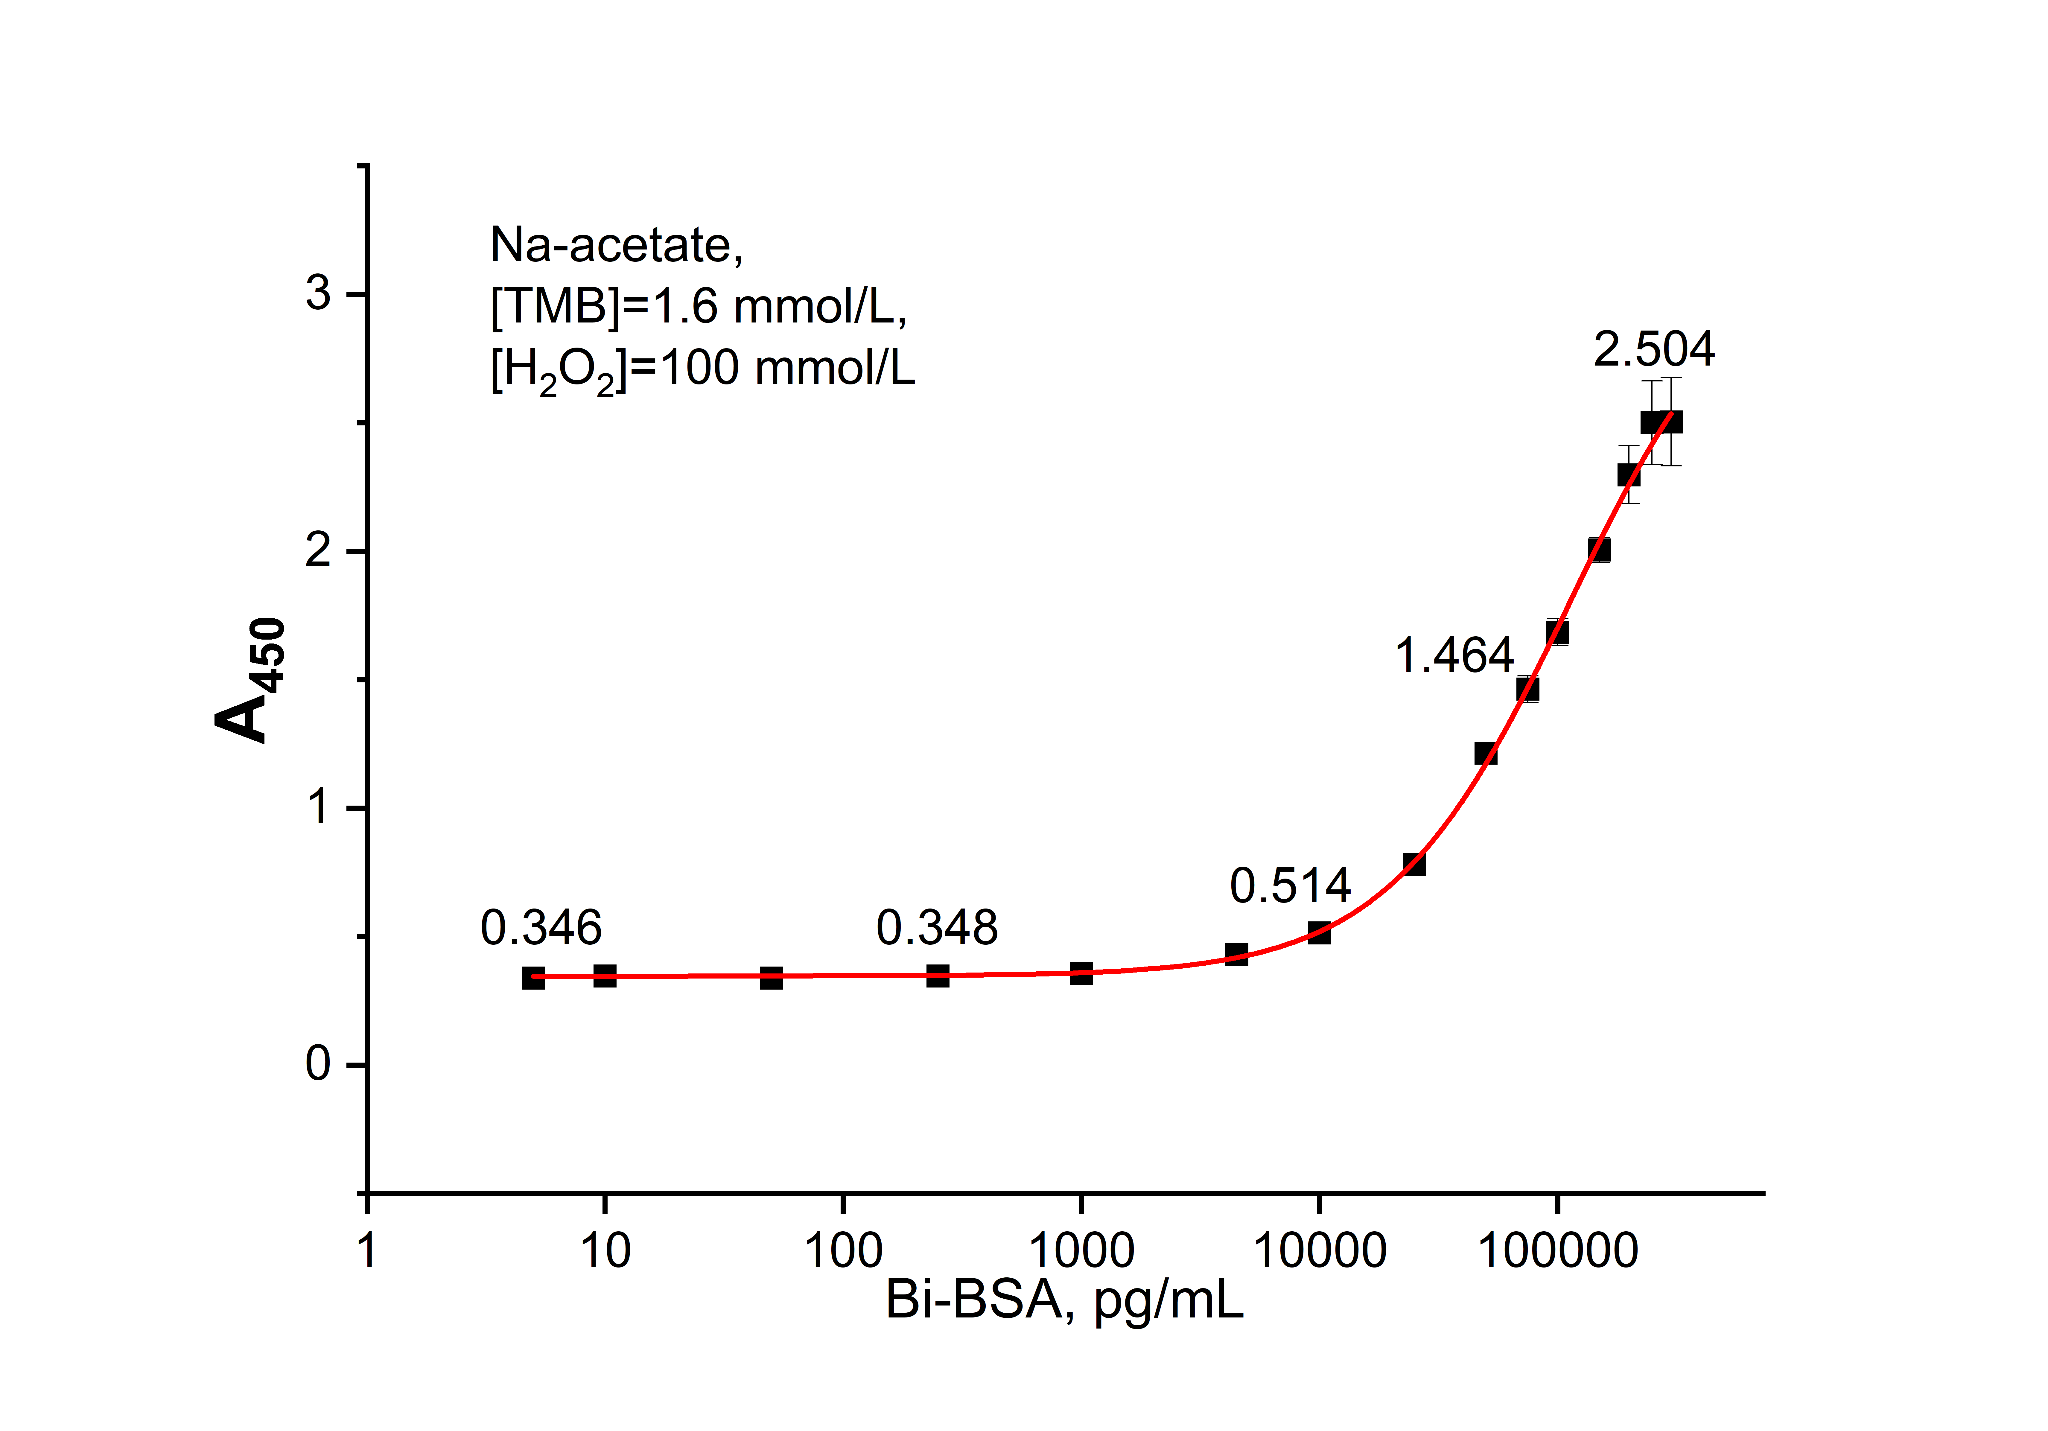
**

**Fig. S15.** Standard curve for the Bi-BSA assay. The curve was generated by fitting the calibration data to a four-parameter logistic model. The assay was performed under the following optimized reaction conditions: 100 mmol/L sodium acetate buffer (pH 4.0), [TMB] = 1.6 mmol/L, [H2O2] = 100 mmol/L, and 10% DMSO (v/v). Data represent the mean ± standard deviation (n = 6).

**
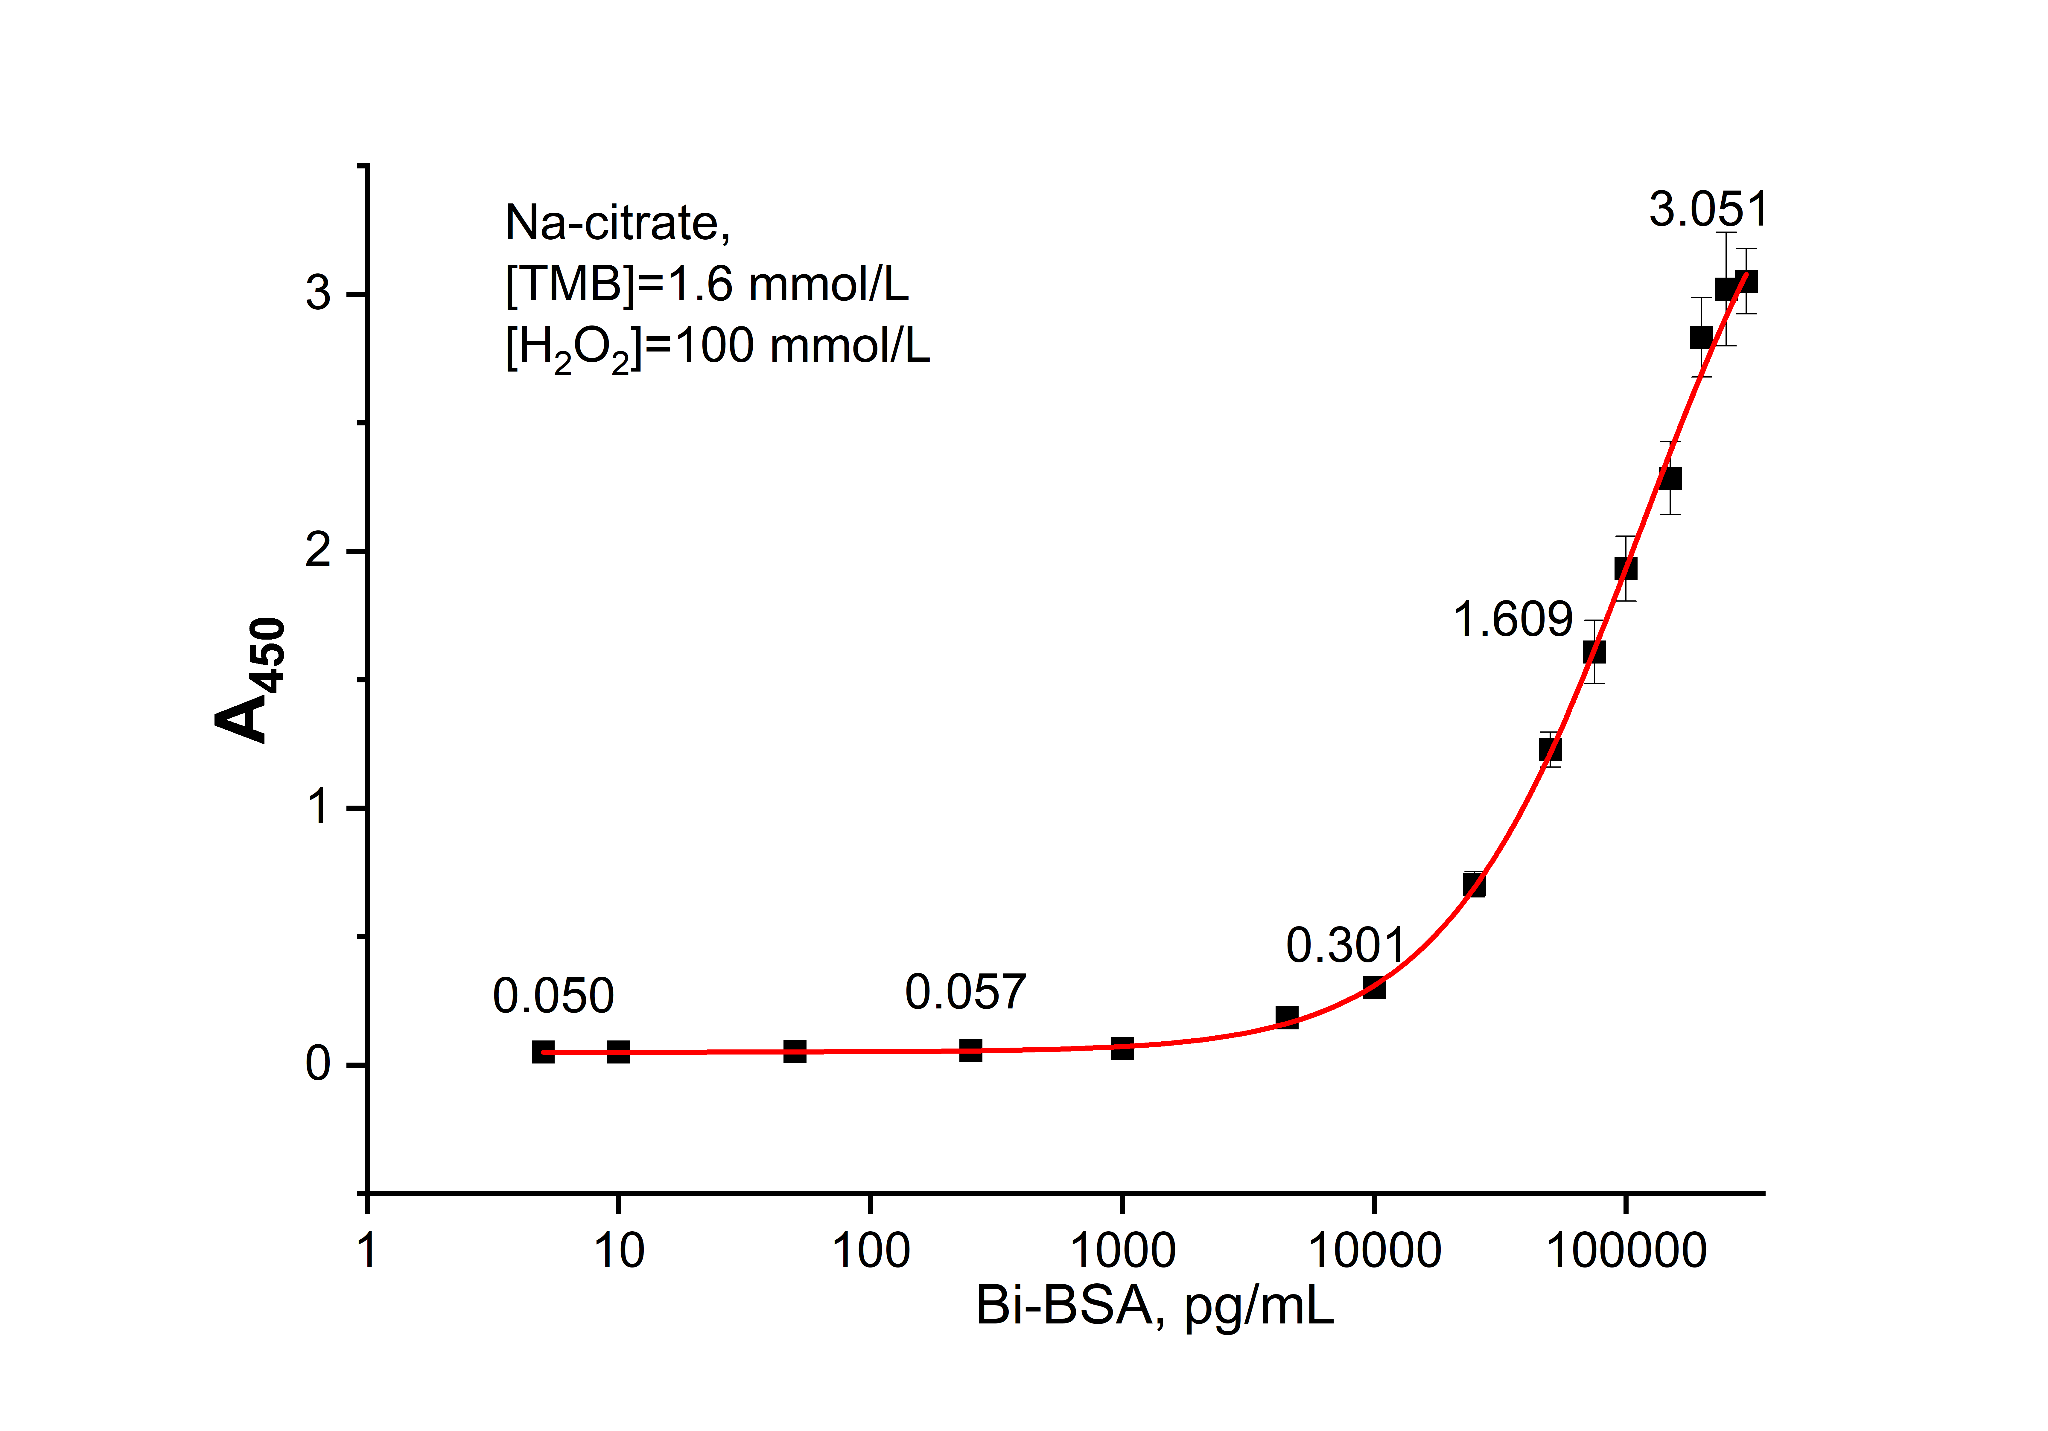
**

**Fig. S16.** Standard curve for the Bi-BSA assay. The curve was generated by fitting the calibration data to a four-parameter logistic model. The assay was performed under the following optimized reaction conditions: 100 mmol/L sodium citrate buffer (pH 4.0), [TMB] = 1.6 mmol/L, [H2O2] = 100 mmol/L, and 10% DMSO (v/v). Data represent the mean ± standard deviation (n = 6).

**
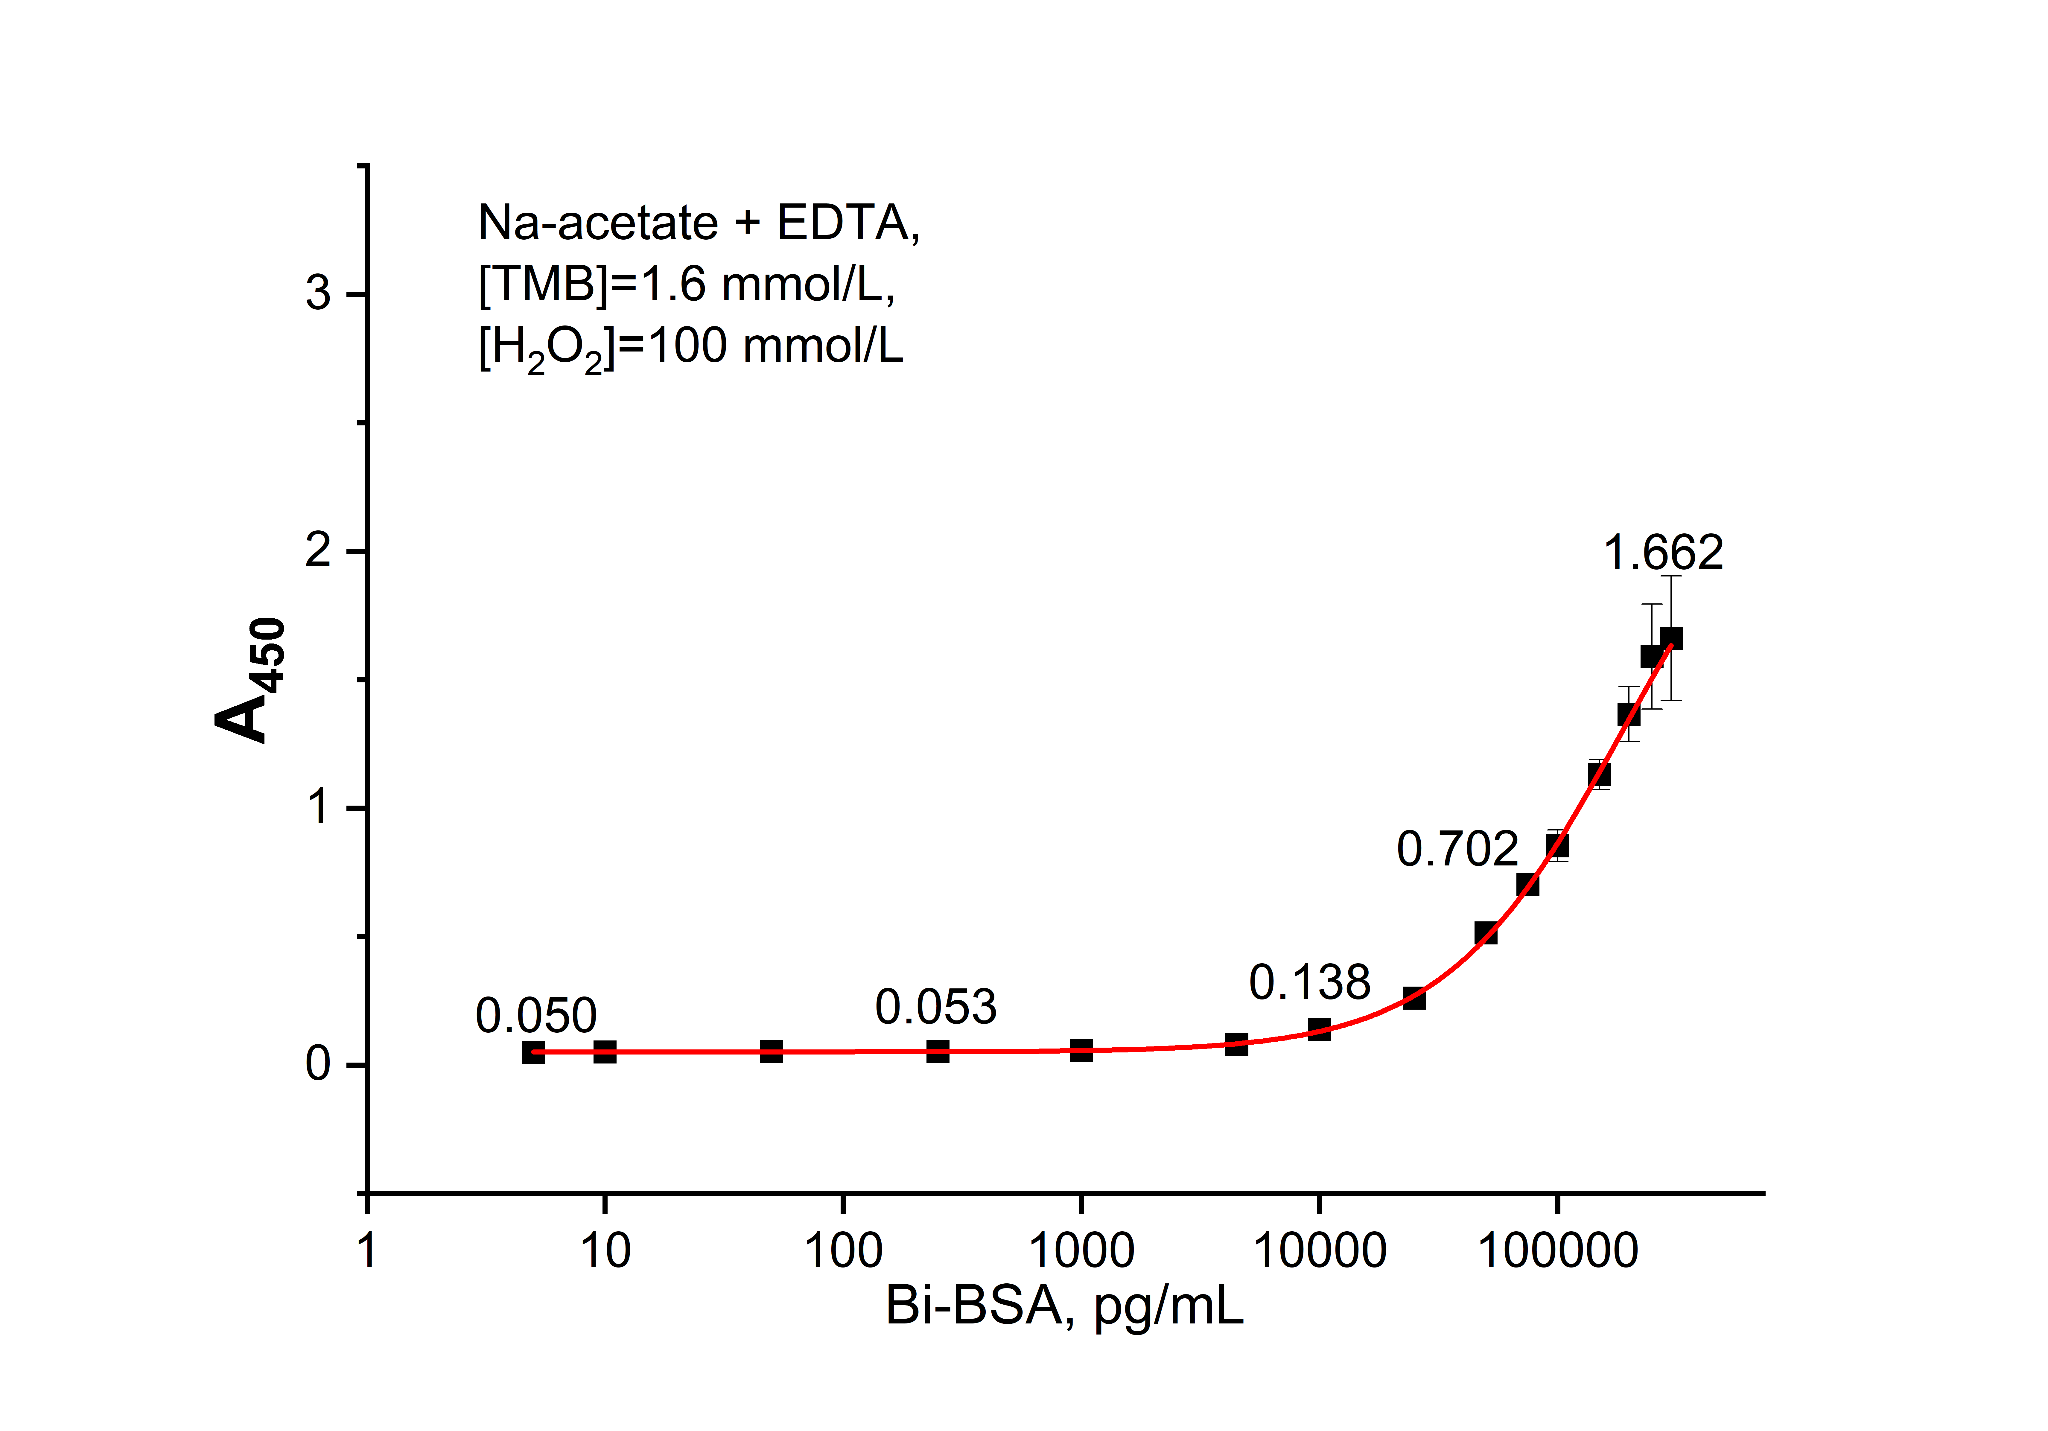
**

**Fig. S17.** Standard curve for the Bi-BSA assay. The curve was generated by fitting the calibration data to a four-parameter logistic model. The assay was performed under the following optimized reaction conditions: 100 mmol/L sodium acetate buffer (pH 4.0), [Na2EDTA] = 100 μmol/L, [TMB] = 1.6 mmol/L, [H2O2] = 100 mmol/L, and 10% DMSO (v/v). Data represent the mean ± standard deviation (n = 6).

**
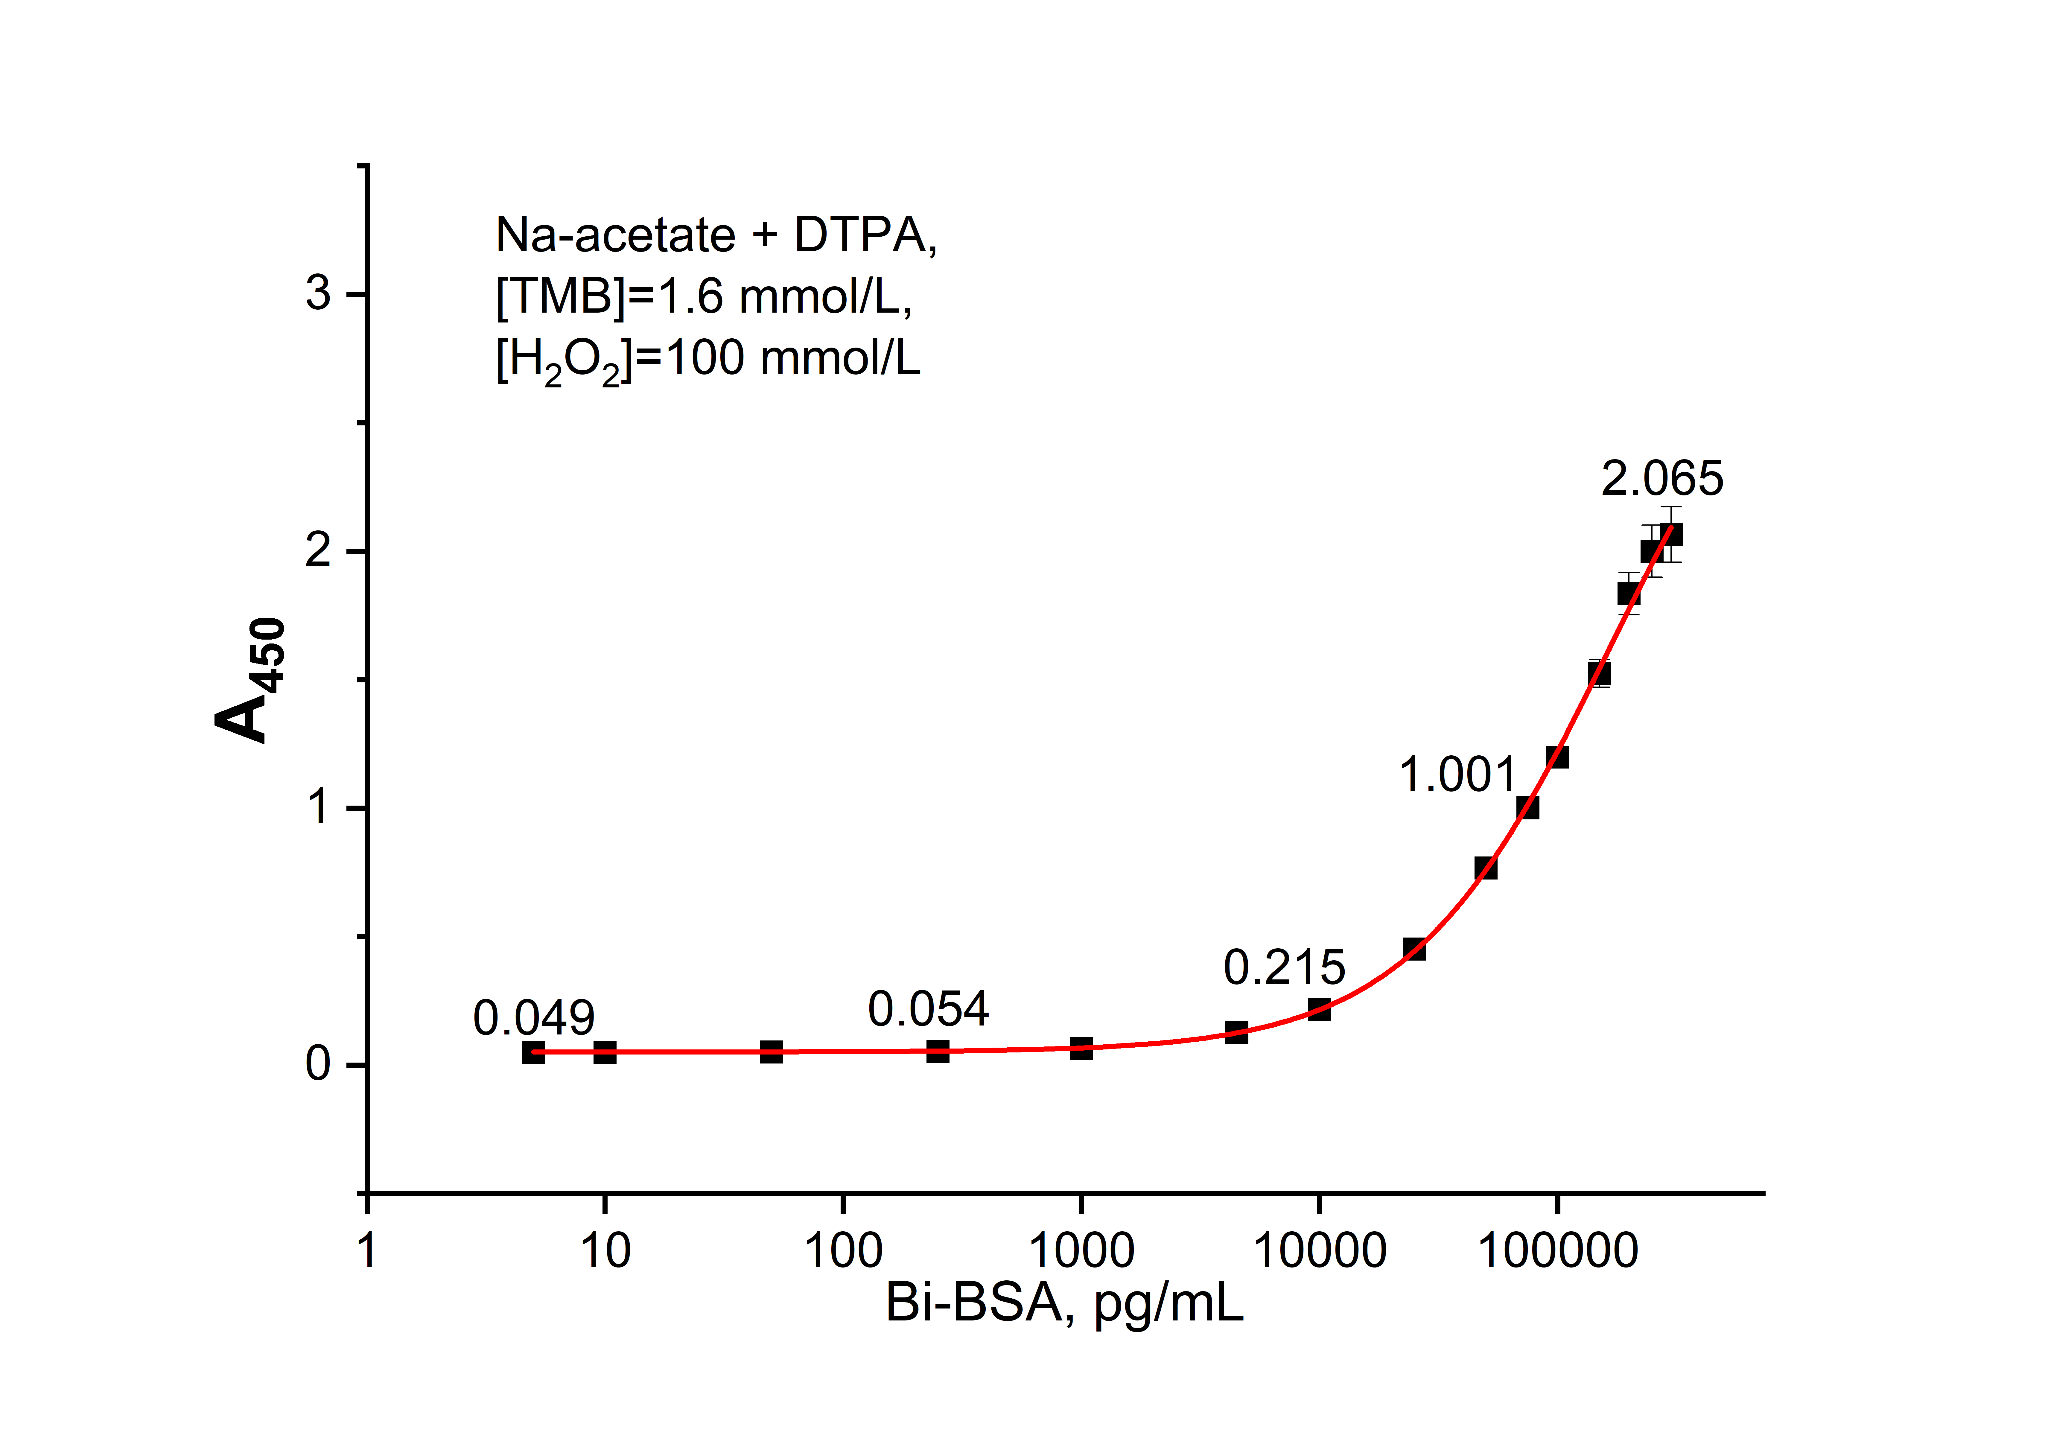
**

**Fig. S18.** Standard curve for the Bi-BSA assay. The curve was generated by fitting the calibration data to a four-parameter logistic model. The assay was performed under the following optimized reaction conditions: 100 mmol/L sodium acetate buffer (pH 4.0), [DTPA] = 100 μmol/L, [TMB] = 1.6 mmol/L, [H2O2] = 100 mmol/L, and 10% DMSO (v/v). Data represent the mean ± standard deviation (n = 6).

**
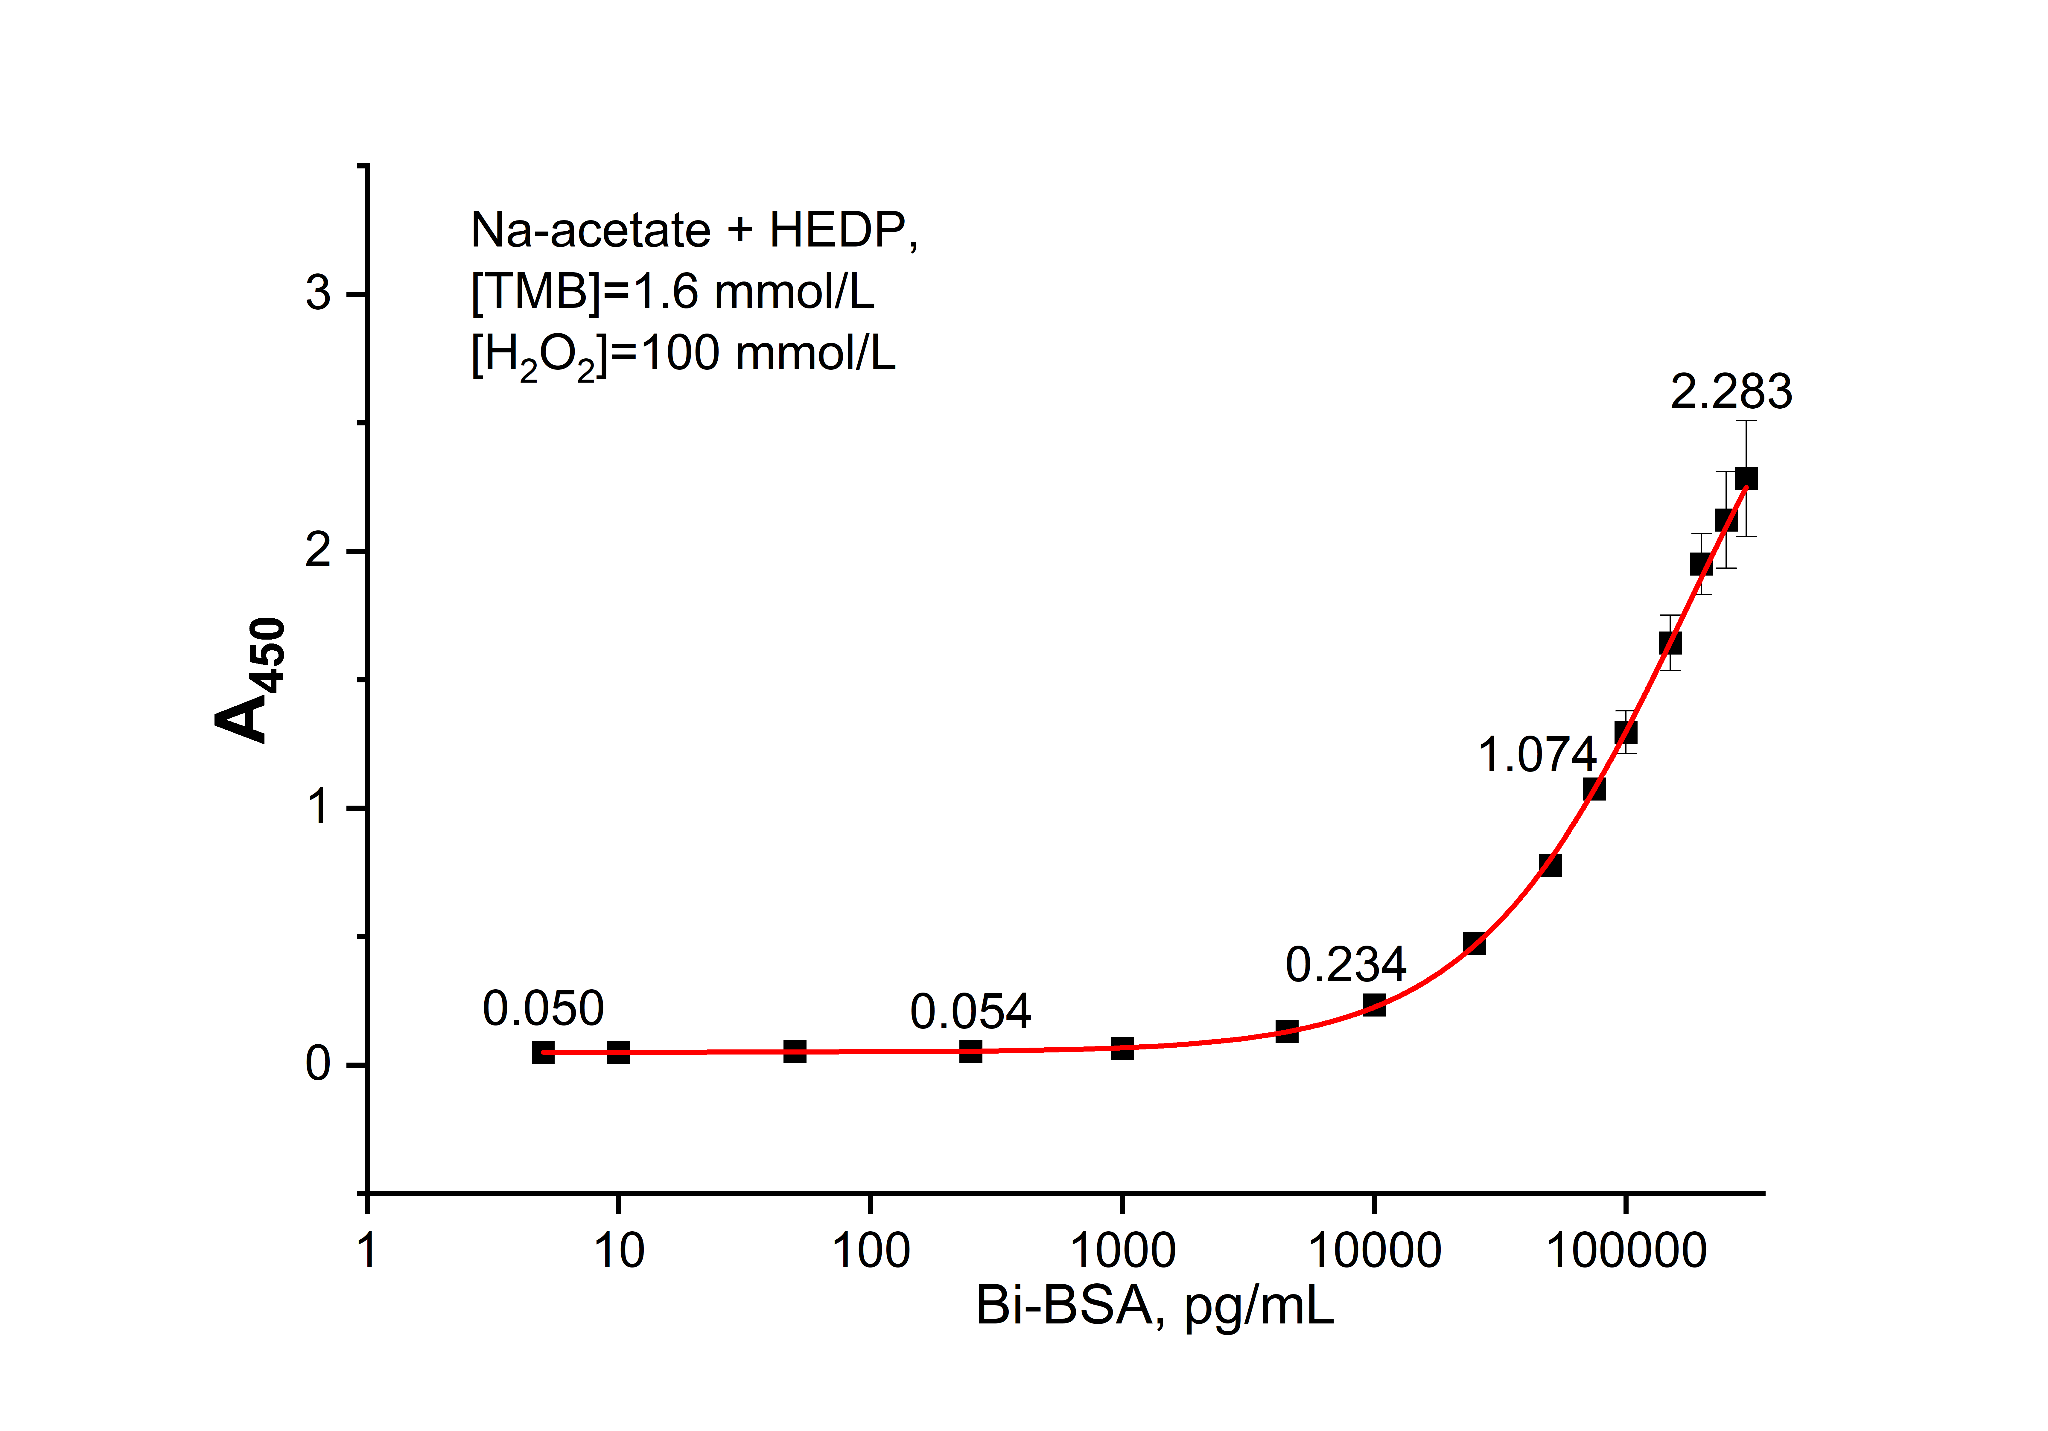
**

**Fig. S19.** Standard curve for the Bi-BSA assay. The curve was generated by fitting the calibration data to a four-parameter logistic model. The assay was performed under the following optimized reaction conditions: 100 mmol/L sodium acetate buffer (pH 4.0), [HEDP] = 100 μmol/L, [TMB] = 1.6 mmol/L, [H2O2] = 100 mmol/L, and 10% DMSO (v/v). Data represent the mean ± standard deviation (n = 6).

**
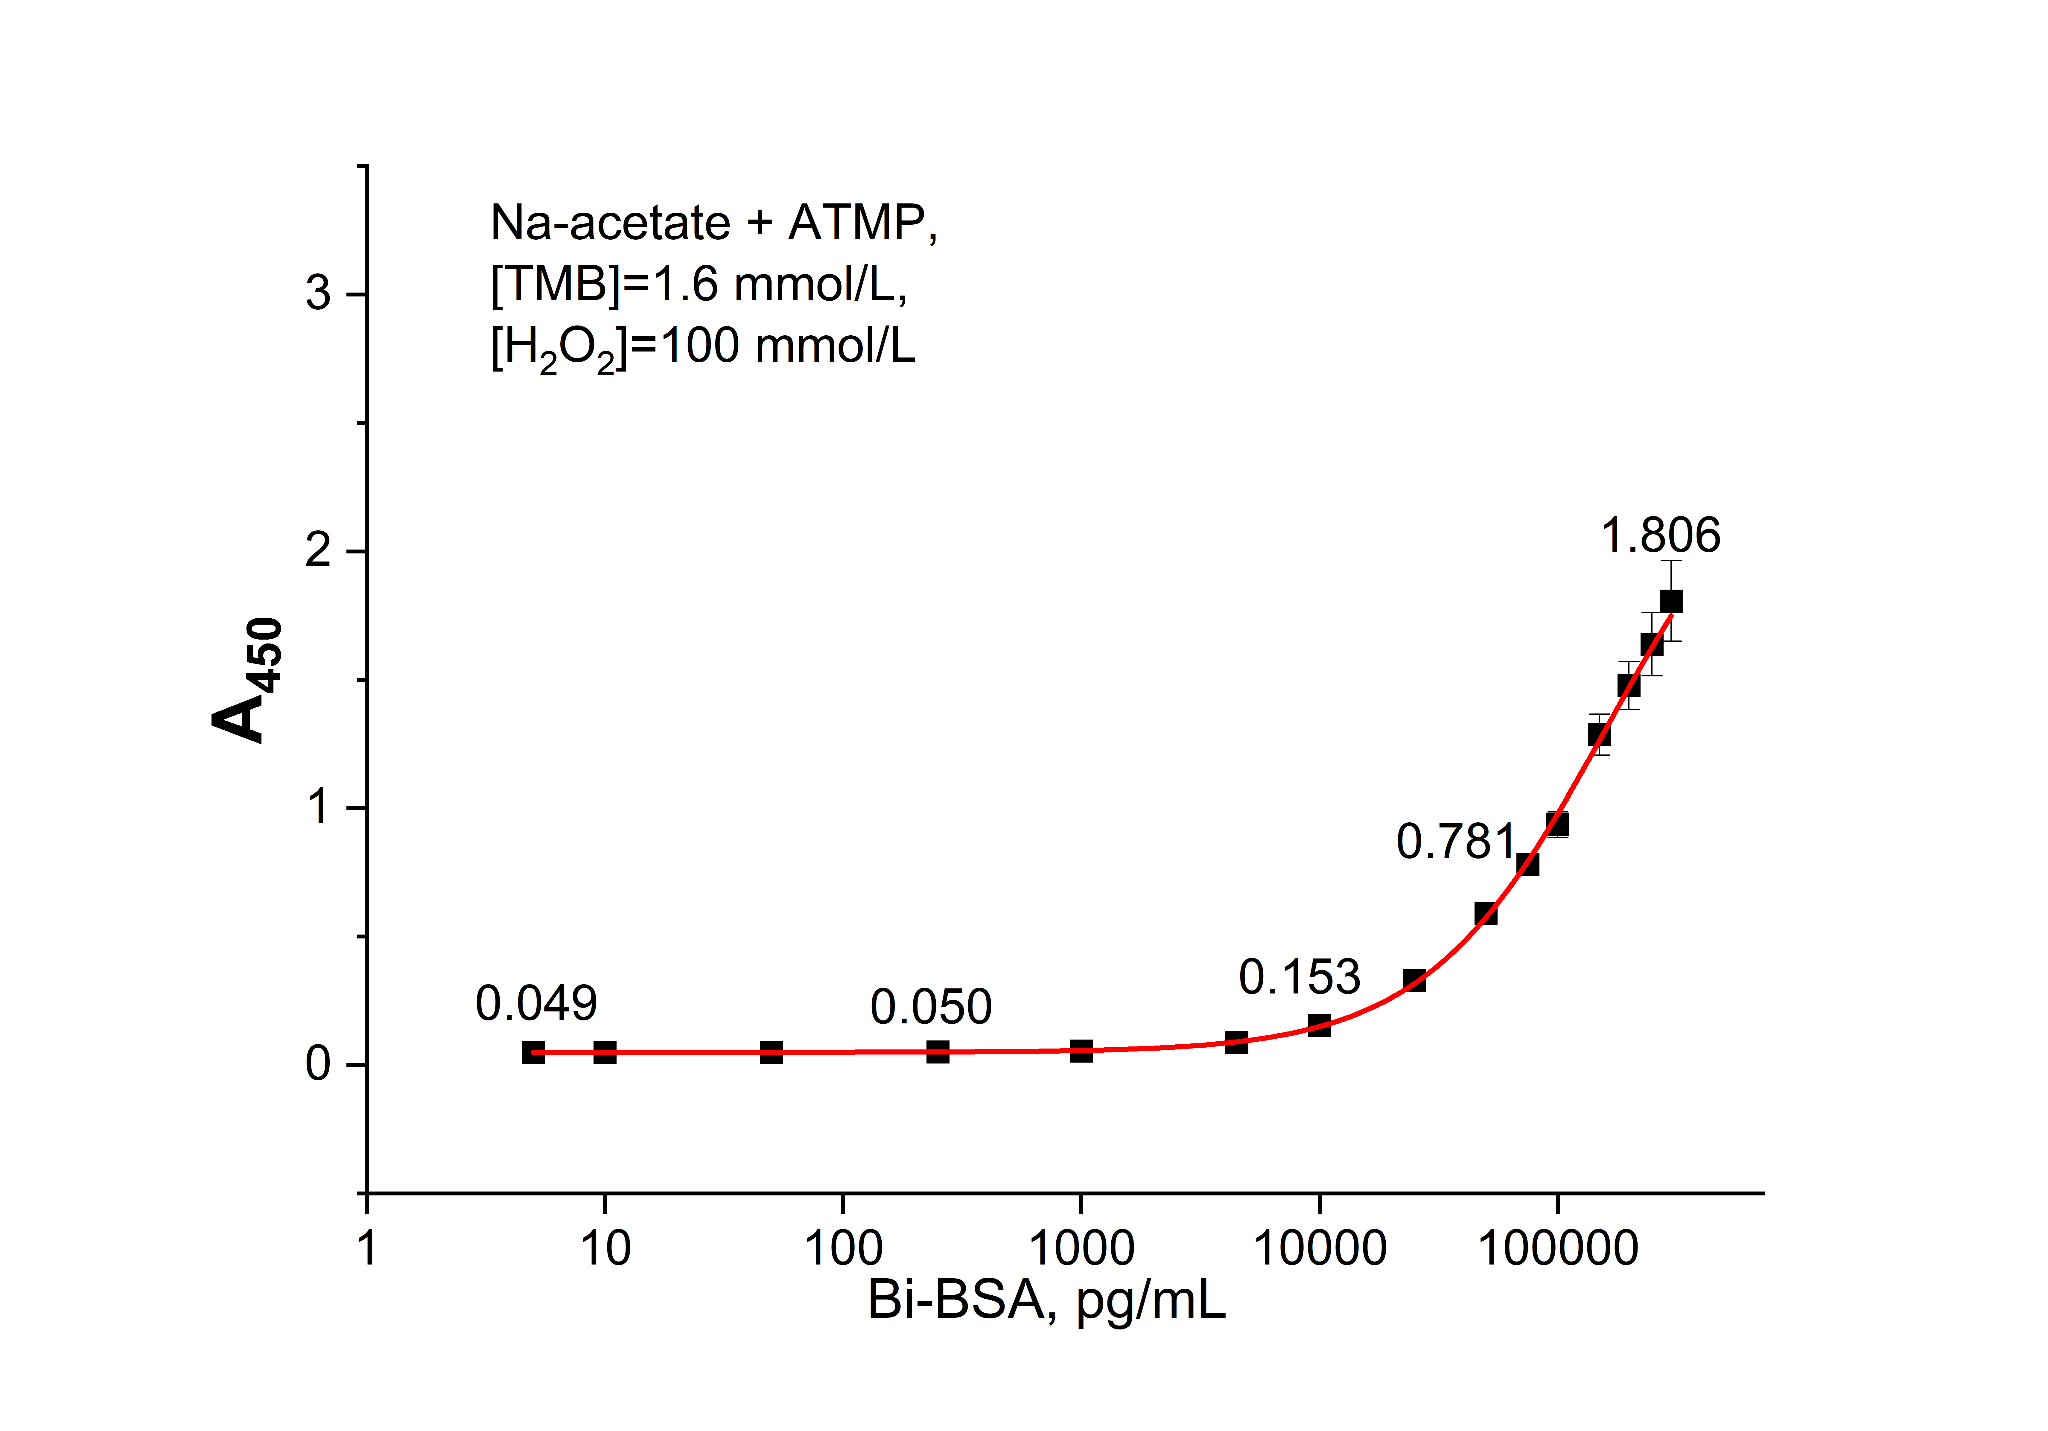
**

**Fig. S20.** Standard curve for the Bi-BSA assay. The curve was generated by fitting the calibration data to a four-parameter logistic model. The assay was performed under the following optimized reaction conditions: 100 mmol/L sodium acetate buffer (pH 4.0), [ATMP] = 100 μmol/L, [TMB] = 1.6 mmol/L, [H2O2] = 100 mmol/L, and 10% DMSO (v/v). Data represent the mean ± standard deviation (n = 6).

**Supplementary Information** The online version contains supplementary material available at https://doi.org/XXXXX
